# Supplementary material for: Somatic Variation of T-Cell Receptor Genes Strongly Associate with HLA Class Restriction
Source: PubMed Central journal article supplement (PMC4627806; doi:10.1371/journal.pone.0140815), 2015-10-30

# Propensity for Vbeta13

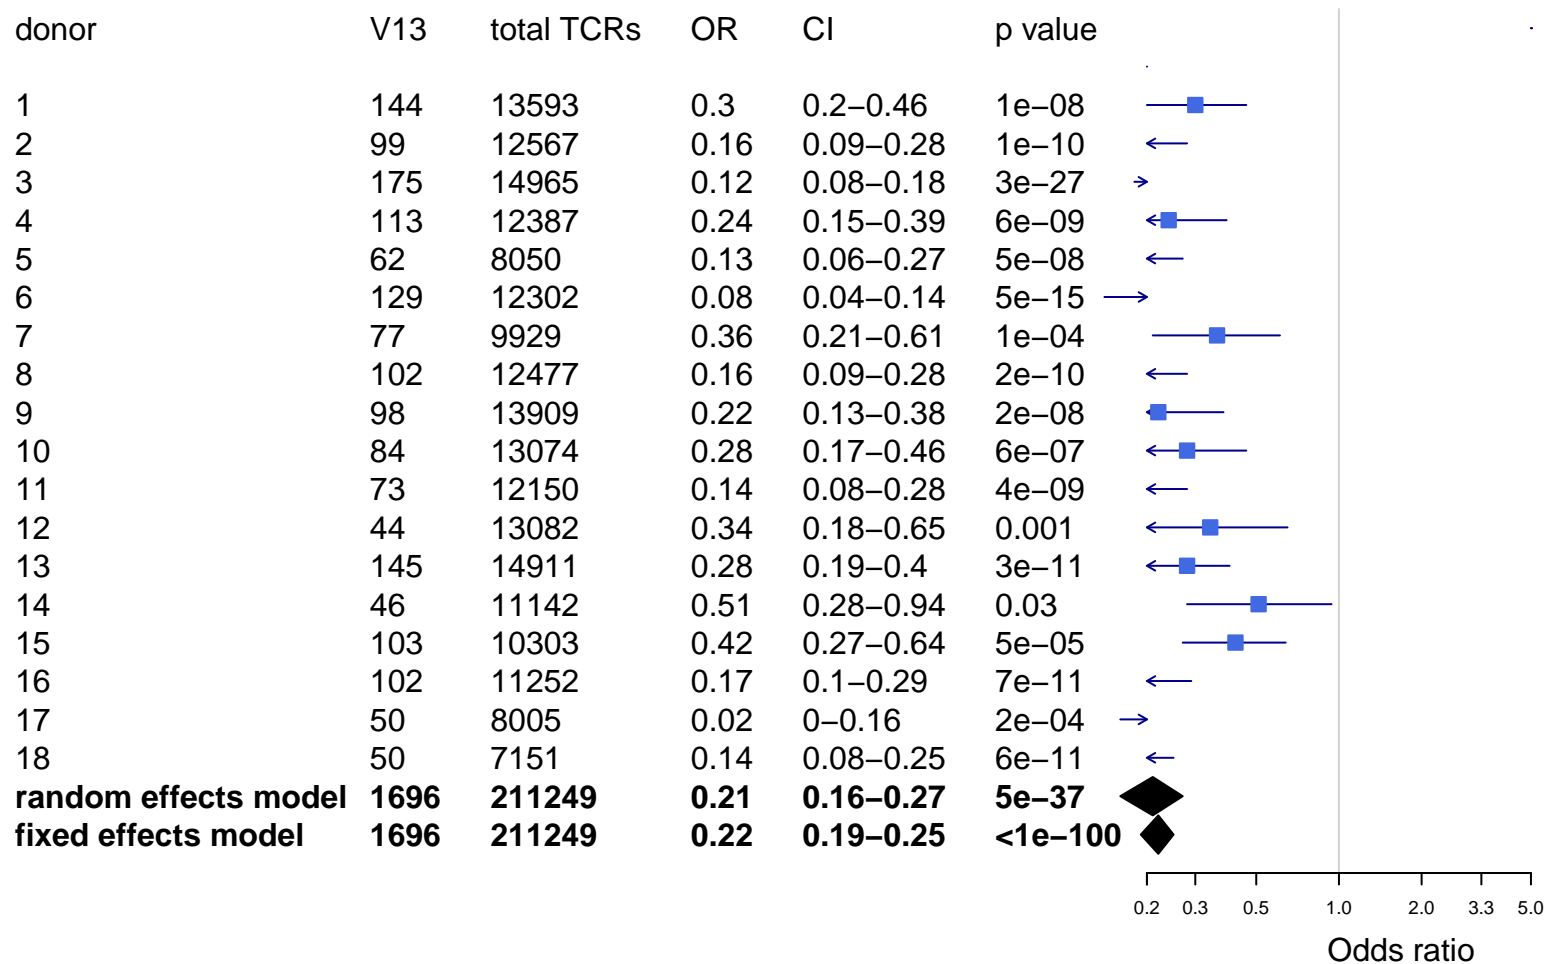

# Propensity for Vbeta27

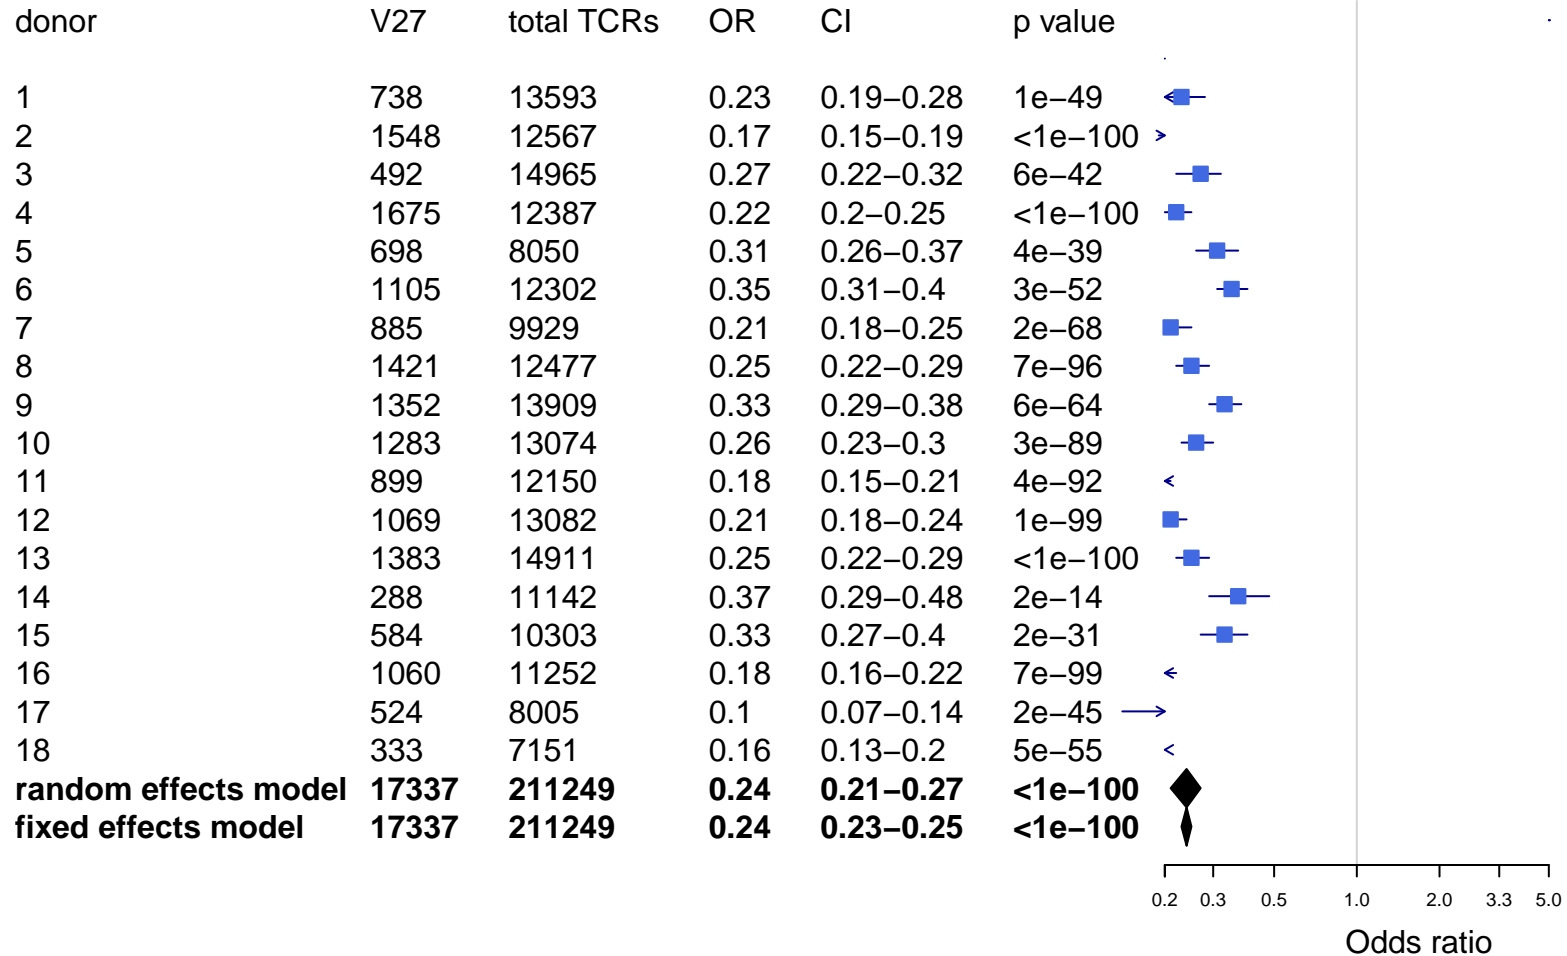

# Propensity for Vbeta7.6

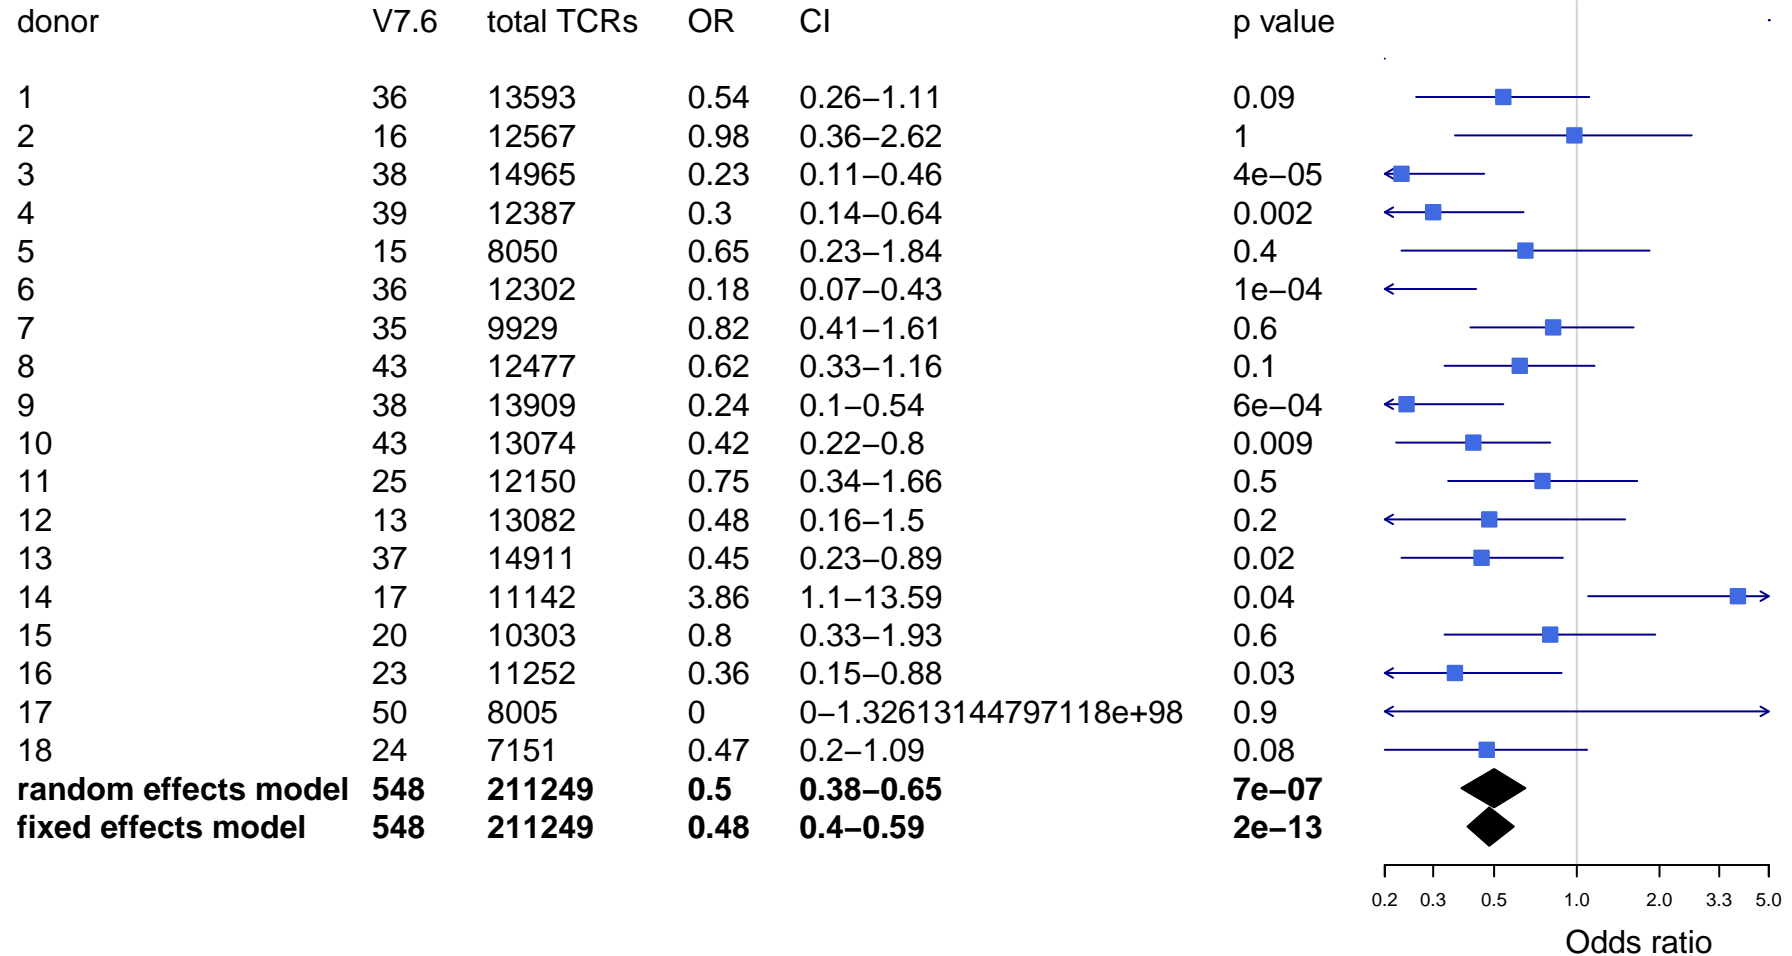

# Propensity for Vbeta7.9

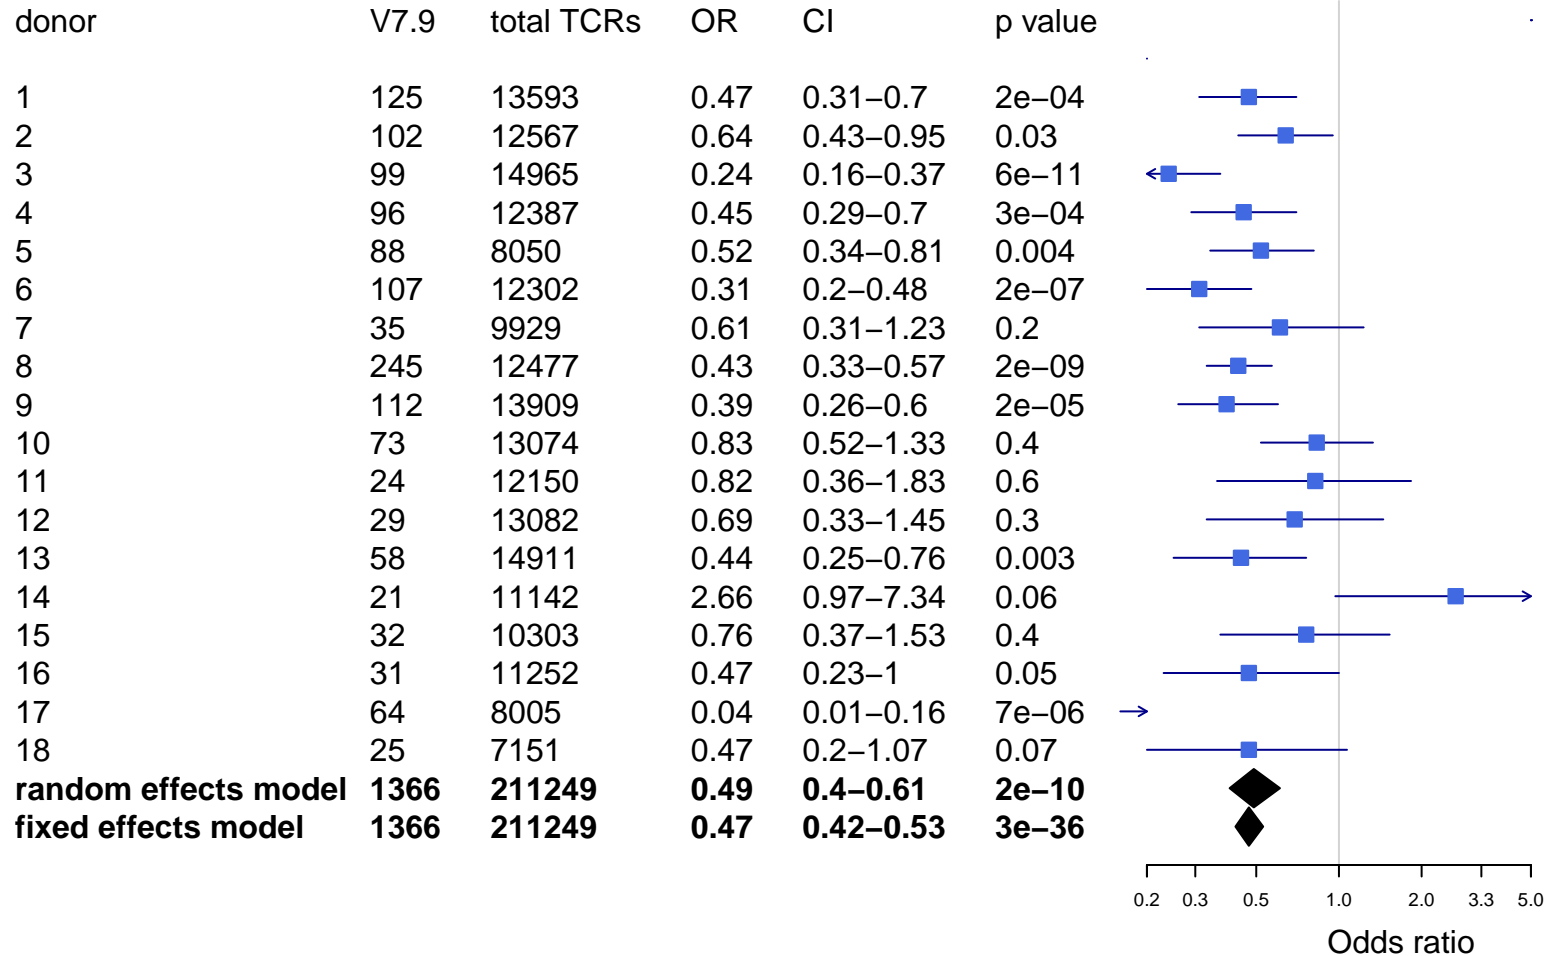

# Propensity for Vbeta7.4

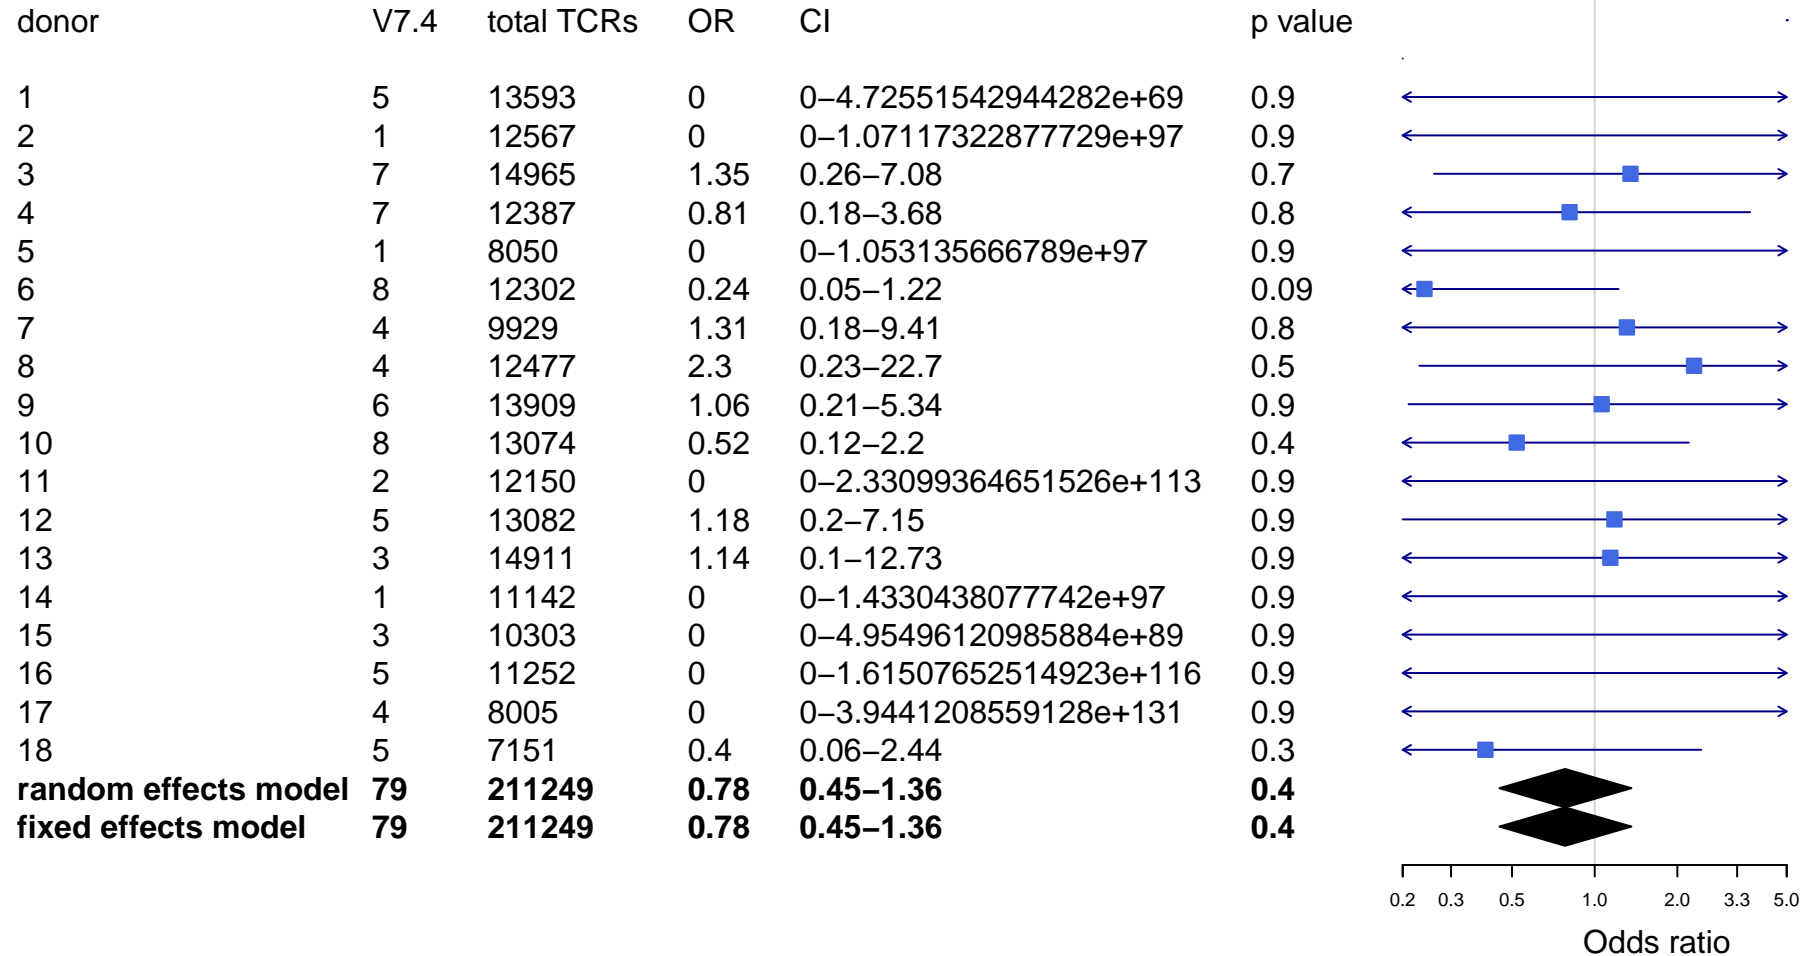

# Propensity for Vbeta4.1

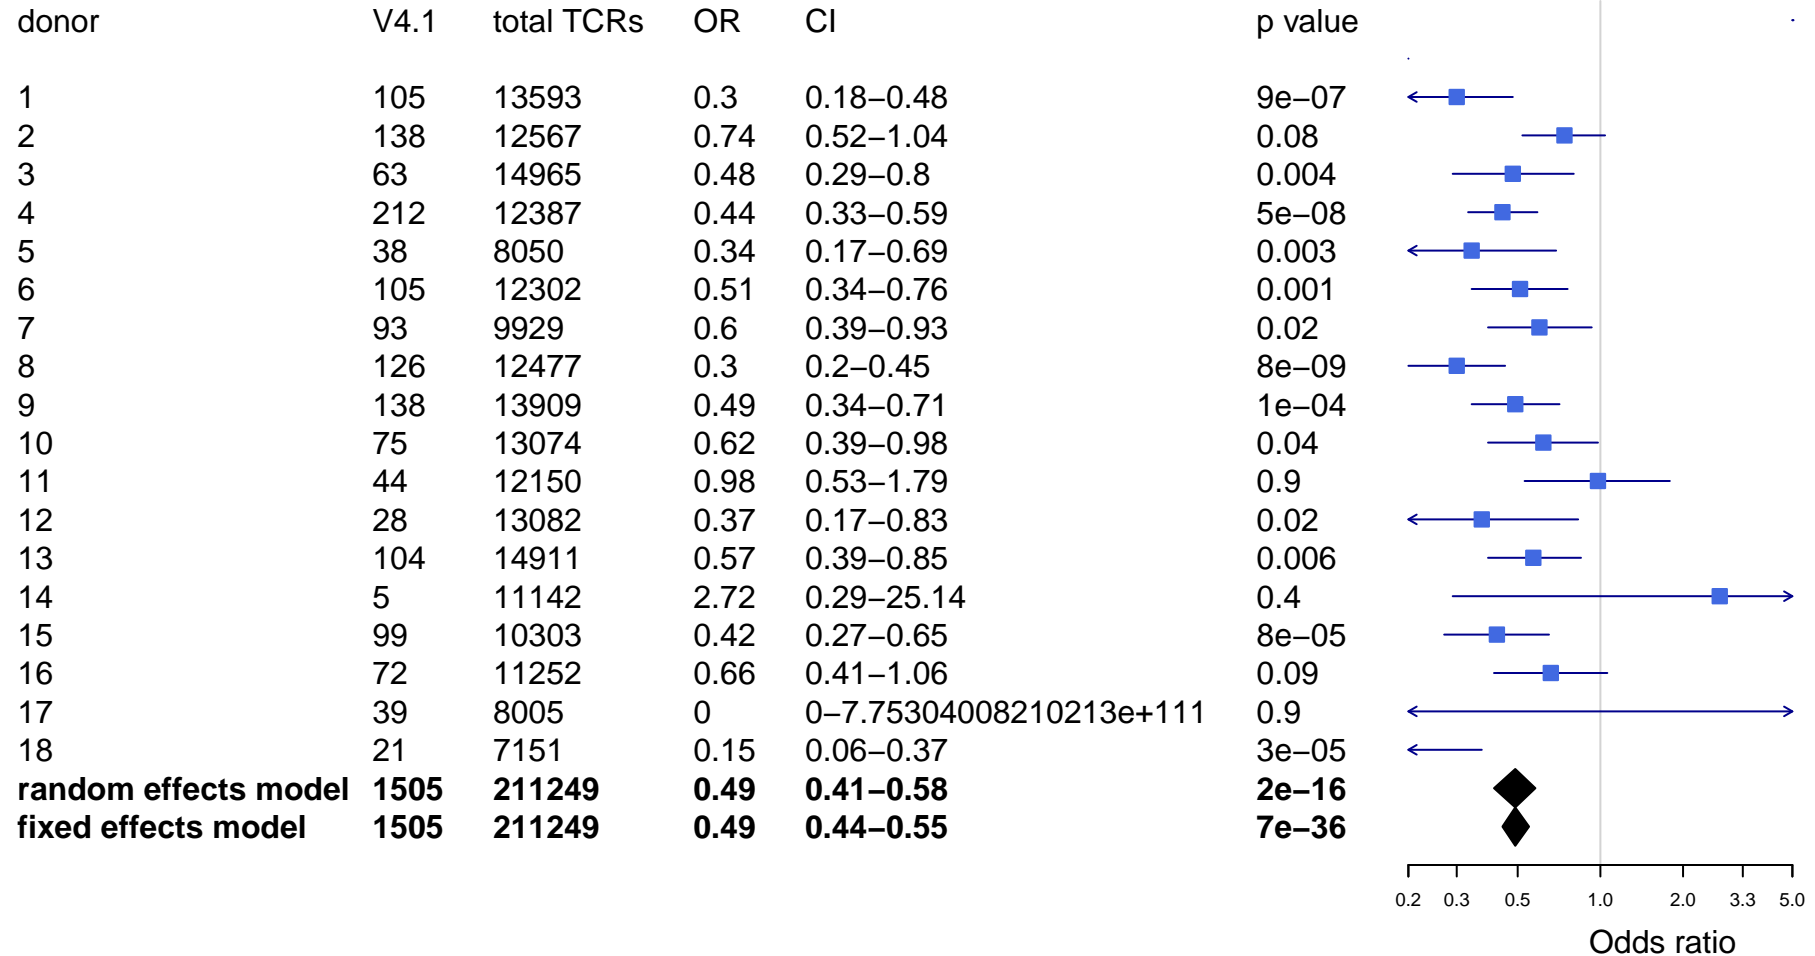

# Propensity for Vbeta7.8

| donor                       | V7.8        | total TCRs    | OR          | CI               | p value      |
|-----------------------------|-------------|---------------|-------------|------------------|--------------|
| 1                           | 359         | 13593         | 0.59        | 0.47–0.74        | 4e–06        |
| 2                           | 166         | 12567         | 0.74        | 0.54–1           | 0.05         |
| 3                           | 205         | 14965         | 0.54        | 0.41–0.71        | 1e–05        |
| 4                           | 269         | 12387         | 0.44        | 0.34–0.58        | 2e–09        |
| 5                           | 146         | 8050          | 0.46        | 0.33–0.66        | 2e–05        |
| 6                           | 226         | 12302         | 0.4         | 0.3–0.53         | 2e–10        |
| 7                           | 154         | 9929          | 0.81        | 0.58–1.12        | 0.2          |
| 8                           | 251         | 12477         | 0.57        | 0.44–0.74        | 2e–05        |
| 9                           | 248         | 13909         | 0.66        | 0.51–0.85        | 0.002        |
| 10                          | 201         | 13074         | 0.75        | 0.56–0.99        | 0.04         |
| 11                          | 135         | 12150         | 0.46        | 0.32–0.66        | 2e–05        |
| 12                          | 139         | 13082         | 0.75        | 0.53–1.05        | 0.09         |
| 13                          | 246         | 14911         | 0.86        | 0.66–1.1         | 0.2          |
| 14                          | 124         | 11142         | 0.92        | 0.64–1.31        | 0.6          |
| 15                          | 148         | 10303         | 0.26        | 0.17–0.38        | 1e–11        |
| 16                          | 139         | 11252         | 0.64        | 0.46–0.91        | 0.01         |
| 17                          | 76          | 8005          | 0.19        | 0.1–0.36         | 5e–07        |
| 18                          | 120         | 7151          | 0.14        | 0.1–0.21         | 4e–24        |
| <b>random effects model</b> | <b>3352</b> | <b>211249</b> | <b>0.52</b> | <b>0.43–0.64</b> | <b>7e–11</b> |
| <b>fixed effects model</b>  | <b>3352</b> | <b>211249</b> | <b>0.56</b> | <b>0.52–0.6</b>  | <b>4e–57</b> |

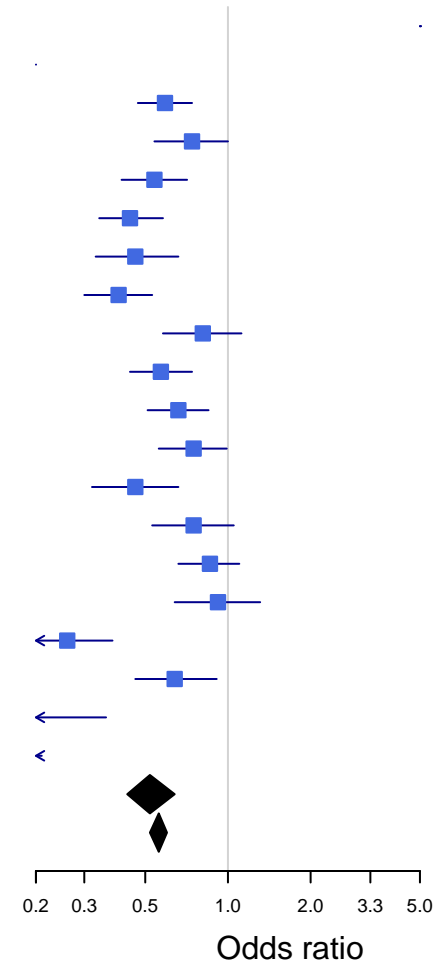

# Propensity for Vbeta5.6

| donor                       | V5.6        | total TCRs    | OR          | CI               | p value      |
|-----------------------------|-------------|---------------|-------------|------------------|--------------|
| 1                           | 354         | 13593         | 0.64        | 0.51–0.8         | 7e–05        |
| 2                           | 261         | 12567         | 0.52        | 0.4–0.67         | 4e–07        |
| 3                           | 314         | 14965         | 0.49        | 0.39–0.61        | 4e–10        |
| 4                           | 283         | 12387         | 0.66        | 0.52–0.84        | 9e–04        |
| 5                           | 211         | 8050          | 0.33        | 0.25–0.46        | 3e–12        |
| 6                           | 332         | 12302         | 0.31        | 0.24–0.4         | 3e–20        |
| 7                           | 227         | 9929          | 0.34        | 0.25–0.47        | 6e–12        |
| 8                           | 213         | 12477         | 0.69        | 0.53–0.92        | 0.01         |
| 9                           | 358         | 13909         | 0.65        | 0.52–0.81        | 1e–04        |
| 10                          | 243         | 13074         | 0.67        | 0.52–0.87        | 0.003        |
| 11                          | 212         | 12150         | 0.39        | 0.29–0.51        | 1e–10        |
| 12                          | 164         | 13082         | 1.05        | 0.76–1.44        | 0.8          |
| 13                          | 305         | 14911         | 0.93        | 0.74–1.17        | 0.5          |
| 14                          | 185         | 11142         | 0.49        | 0.36–0.67        | 5e–06        |
| 15                          | 208         | 10303         | 0.62        | 0.47–0.82        | 8e–04        |
| 16                          | 212         | 11252         | 0.57        | 0.43–0.75        | 8e–05        |
| 17                          | 139         | 8005          | 0.62        | 0.43–0.89        | 0.01         |
| 18                          | 94          | 7151          | 0.7         | 0.44–1.11        | 0.1          |
| <b>random effects model</b> | <b>4315</b> | <b>211249</b> | <b>0.56</b> | <b>0.48–0.66</b> | <b>2e–13</b> |
| <b>fixed effects model</b>  | <b>4315</b> | <b>211249</b> | <b>0.57</b> | <b>0.53–0.6</b>  | <b>2e–68</b> |

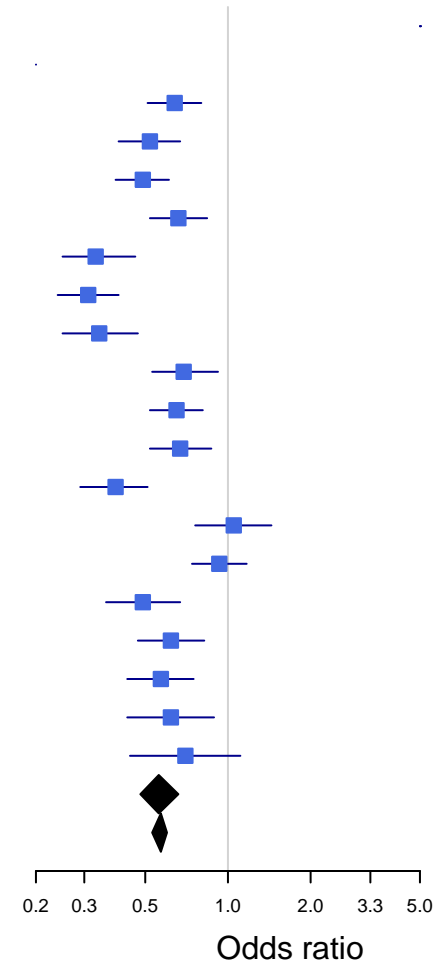



# Propensity for Vbeta12.5

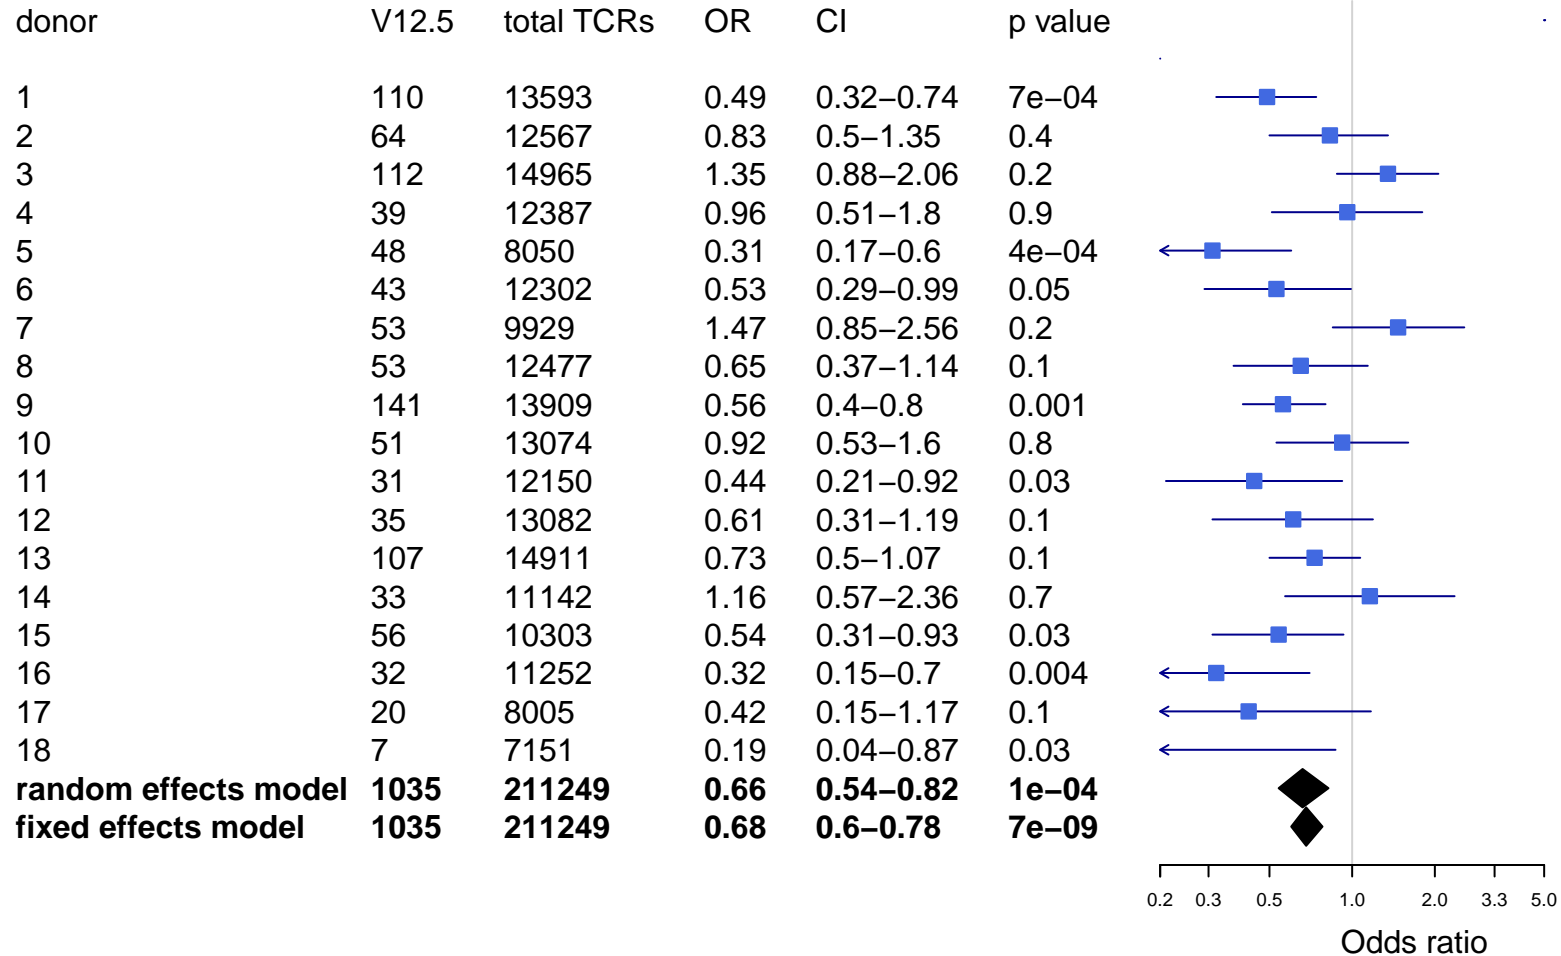

# Propensity for Vbeta14

| donor                       | V14         | total TCRs    | OR          | CI               | p value      |
|-----------------------------|-------------|---------------|-------------|------------------|--------------|
| 1                           | 139         | 13593         | 0.74        | 0.52–1.05        | 0.09         |
| 2                           | 92          | 12567         | 1.31        | 0.86–1.98        | 0.2          |
| 3                           | 122         | 14965         | 0.28        | 0.19–0.41        | 4e-11        |
| 4                           | 44          | 12387         | 0.93        | 0.51–1.7         | 0.8          |
| 5                           | 50          | 8050          | 0.81        | 0.46–1.42        | 0.5          |
| 6                           | 36          | 12302         | 0.74        | 0.38–1.45        | 0.4          |
| 7                           | 66          | 9929          | 0.55        | 0.33–0.93        | 0.02         |
| 8                           | 80          | 12477         | 0.82        | 0.52–1.28        | 0.4          |
| 9                           | 86          | 13909         | 0.6         | 0.39–0.94        | 0.02         |
| 10                          | 110         | 13074         | 0.87        | 0.59–1.27        | 0.5          |
| 11                          | 44          | 12150         | 0.96        | 0.53–1.74        | 0.9          |
| 12                          | 52          | 13082         | 1.07        | 0.62–1.87        | 0.8          |
| 13                          | 95          | 14911         | 0.74        | 0.49–1.11        | 0.1          |
| 14                          | 33          | 11142         | 5.81        | 2.03–16.63       | 0.001        |
| 15                          | 46          | 10303         | 0.84        | 0.47–1.52        | 0.6          |
| 16                          | 45          | 11252         | 1.14        | 0.63–2.07        | 0.7          |
| 17                          | 66          | 8005          | 0.12        | 0.05–0.28        | 8e-07        |
| 18                          | 44          | 7151          | 0.59        | 0.31–1.14        | 0.1          |
| <b>random effects model</b> | <b>1250</b> | <b>211249</b> | <b>0.76</b> | <b>0.59–0.97</b> | <b>0.03</b>  |
| <b>fixed effects model</b>  | <b>1250</b> | <b>211249</b> | <b>0.73</b> | <b>0.65–0.82</b> | <b>2e-07</b> |

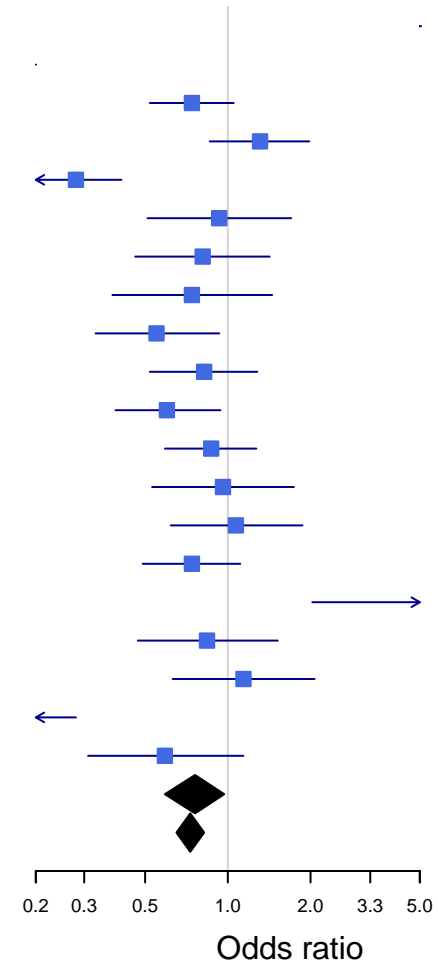

# Propensity for Vbeta11.2

| donor                       | V11.2       | total TCRs    | OR          | CI               | p value      |
|-----------------------------|-------------|---------------|-------------|------------------|--------------|
| 1                           | 496         | 13593         | 1.02        | 0.85–1.22        | 0.9          |
| 2                           | 178         | 12567         | 0.58        | 0.42–0.78        | 4e-04        |
| 3                           | 406         | 14965         | 0.47        | 0.38–0.57        | 9e-14        |
| 4                           | 399         | 12387         | 0.83        | 0.68–1.02        | 0.07         |
| 5                           | 166         | 8050          | 0.79        | 0.58–1.08        | 0.1          |
| 6                           | 429         | 12302         | 0.73        | 0.6–0.88         | 0.001        |
| 7                           | 309         | 9929          | 0.37        | 0.29–0.48        | 6e-14        |
| 8                           | 171         | 12477         | 0.88        | 0.65–1.2         | 0.4          |
| 9                           | 665         | 13909         | 0.5         | 0.42–0.59        | 2e-16        |
| 10                          | 411         | 13074         | 1.01        | 0.83–1.23        | 0.9          |
| 11                          | 120         | 12150         | 0.84        | 0.59–1.21        | 0.4          |
| 12                          | 179         | 13082         | 0.83        | 0.62–1.12        | 0.2          |
| 13                          | 271         | 14911         | 0.82        | 0.65–1.05        | 0.1          |
| 14                          | 204         | 11142         | 4.67        | 3.19–6.84        | 2e-15        |
| 15                          | 372         | 10303         | 0.96        | 0.77–1.18        | 0.7          |
| 16                          | 226         | 11252         | 0.7         | 0.54–0.91        | 0.009        |
| 17                          | 124         | 8005          | 0.12        | 0.06–0.22        | 2e-11        |
| 18                          | 114         | 7151          | 0.4         | 0.27–0.58        | 3e-06        |
| <b>random effects model</b> | <b>5240</b> | <b>211249</b> | <b>0.72</b> | <b>0.58–0.9</b>  | <b>0.003</b> |
| <b>fixed effects model</b>  | <b>5240</b> | <b>211249</b> | <b>0.73</b> | <b>0.69–0.77</b> | <b>2e-26</b> |

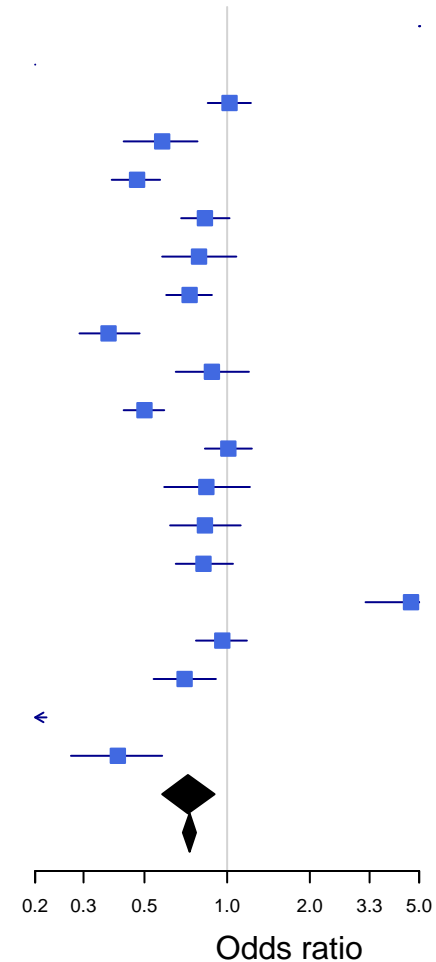

# Propensity for Vbeta15

| donor                       | V15         | total TCRs    | OR          | CI               | p value      |
|-----------------------------|-------------|---------------|-------------|------------------|--------------|
| 1                           | 259         | 13593         | 0.85        | 0.66–1.1         | 0.2          |
| 2                           | 290         | 12567         | 0.65        | 0.51–0.82        | 4e–04        |
| 3                           | 296         | 14965         | 1.51        | 1.16–1.98        | 0.002        |
| 4                           | 282         | 12387         | 0.91        | 0.72–1.16        | 0.5          |
| 5                           | 199         | 8050          | 0.55        | 0.41–0.74        | 6e–05        |
| 6                           | 244         | 12302         | 0.91        | 0.7–1.17         | 0.5          |
| 7                           | 219         | 9929          | 0.96        | 0.73–1.26        | 0.8          |
| 8                           | 242         | 12477         | 0.81        | 0.63–1.05        | 0.1          |
| 9                           | 384         | 13909         | 1.05        | 0.85–1.28        | 0.7          |
| 10                          | 258         | 13074         | 1.5         | 1.16–1.95        | 0.002        |
| 11                          | 225         | 12150         | 0.65        | 0.5–0.85         | 0.002        |
| 12                          | 297         | 13082         | 0.73        | 0.58–0.93        | 0.009        |
| 13                          | 470         | 14911         | 0.82        | 0.68–0.99        | 0.04         |
| 14                          | 190         | 11142         | 0.52        | 0.39–0.7         | 2e–05        |
| 15                          | 189         | 10303         | 0.98        | 0.73–1.31        | 0.9          |
| 16                          | 271         | 11252         | 0.79        | 0.62–1.01        | 0.06         |
| 17                          | 130         | 8005          | 1.07        | 0.76–1.53        | 0.7          |
| 18                          | 125         | 7151          | 0.67        | 0.45–1           | 0.05         |
| <b>random effects model</b> | <b>4570</b> | <b>211249</b> | <b>0.85</b> | <b>0.75–0.97</b> | <b>0.02</b>  |
| <b>fixed effects model</b>  | <b>4570</b> | <b>211249</b> | <b>0.86</b> | <b>0.81–0.91</b> | <b>7e–07</b> |

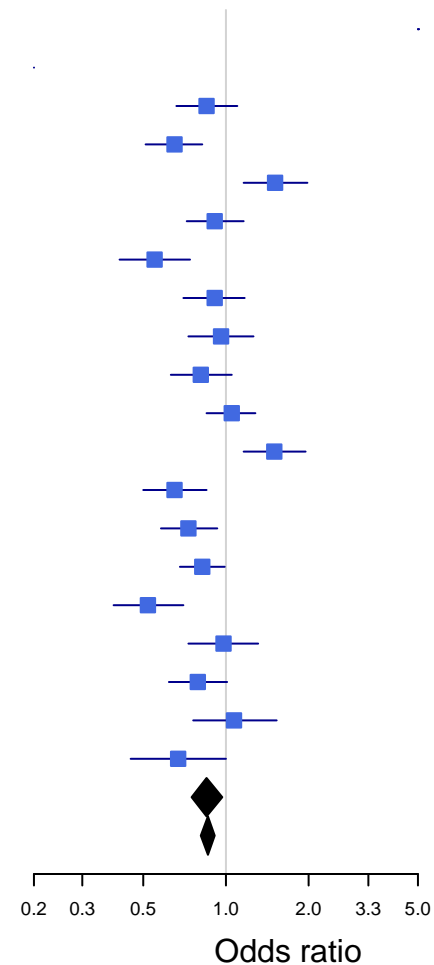

# Propensity for Vbeta5.8

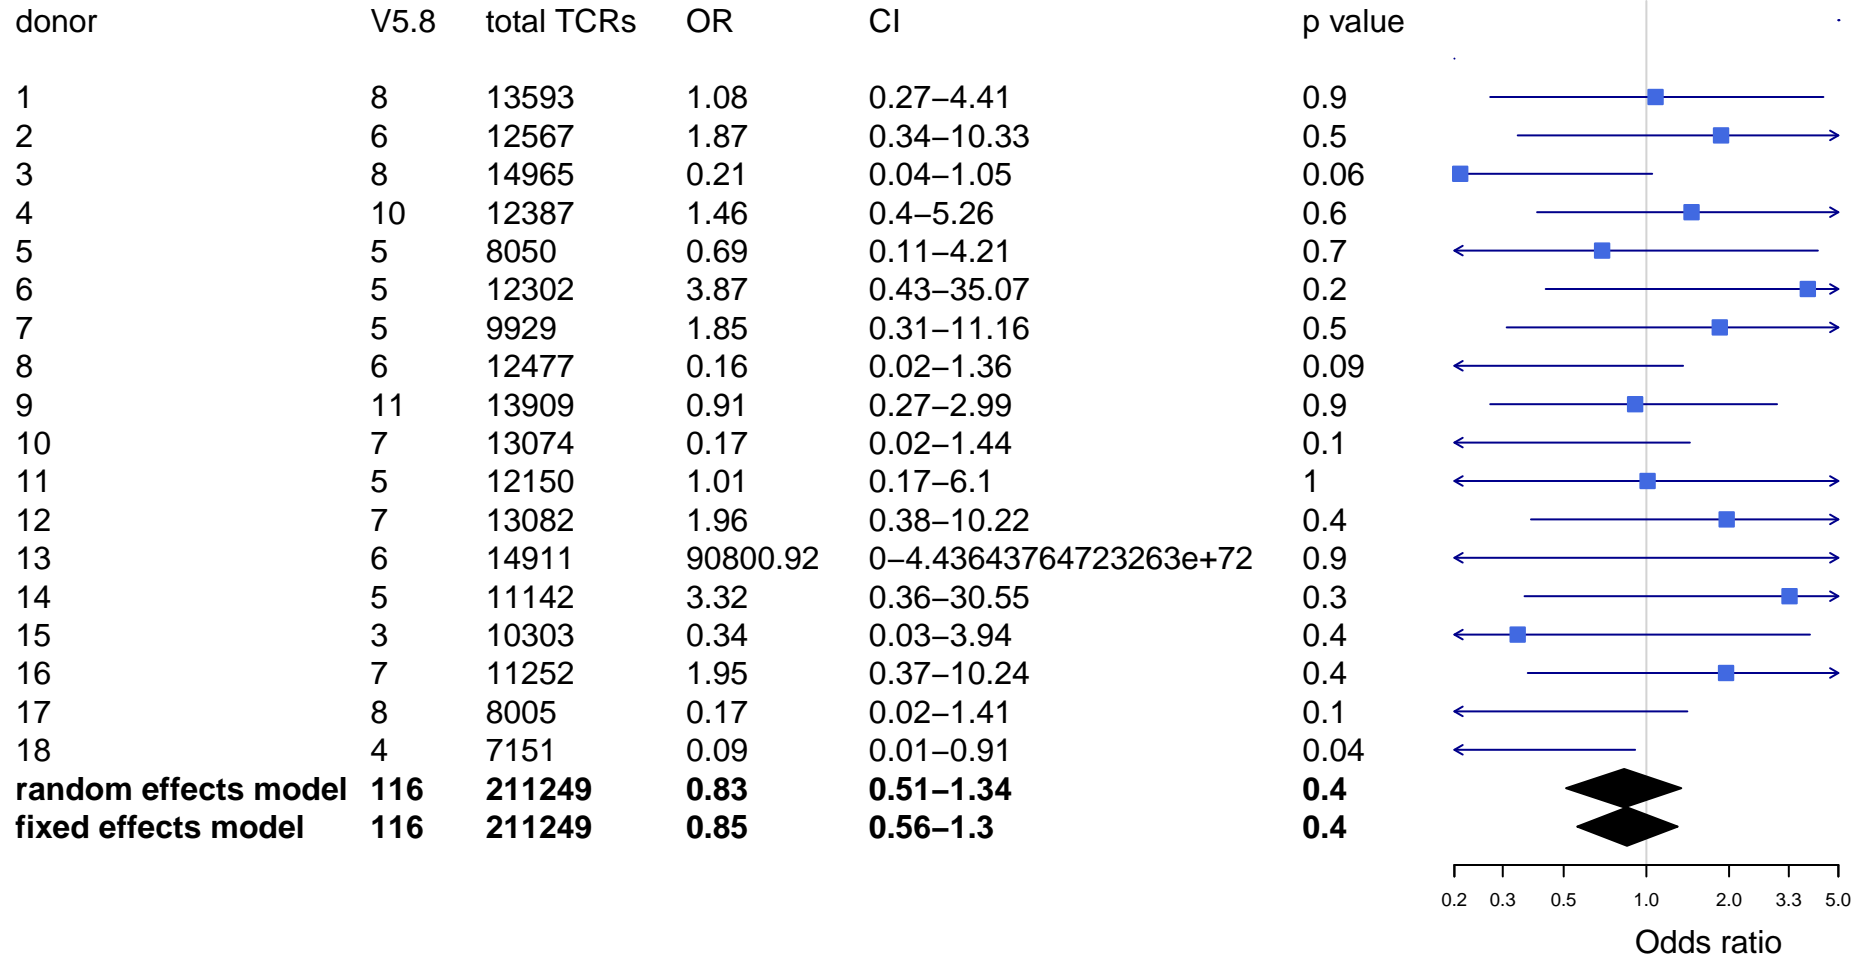

# Propensity for Vbeta10.2

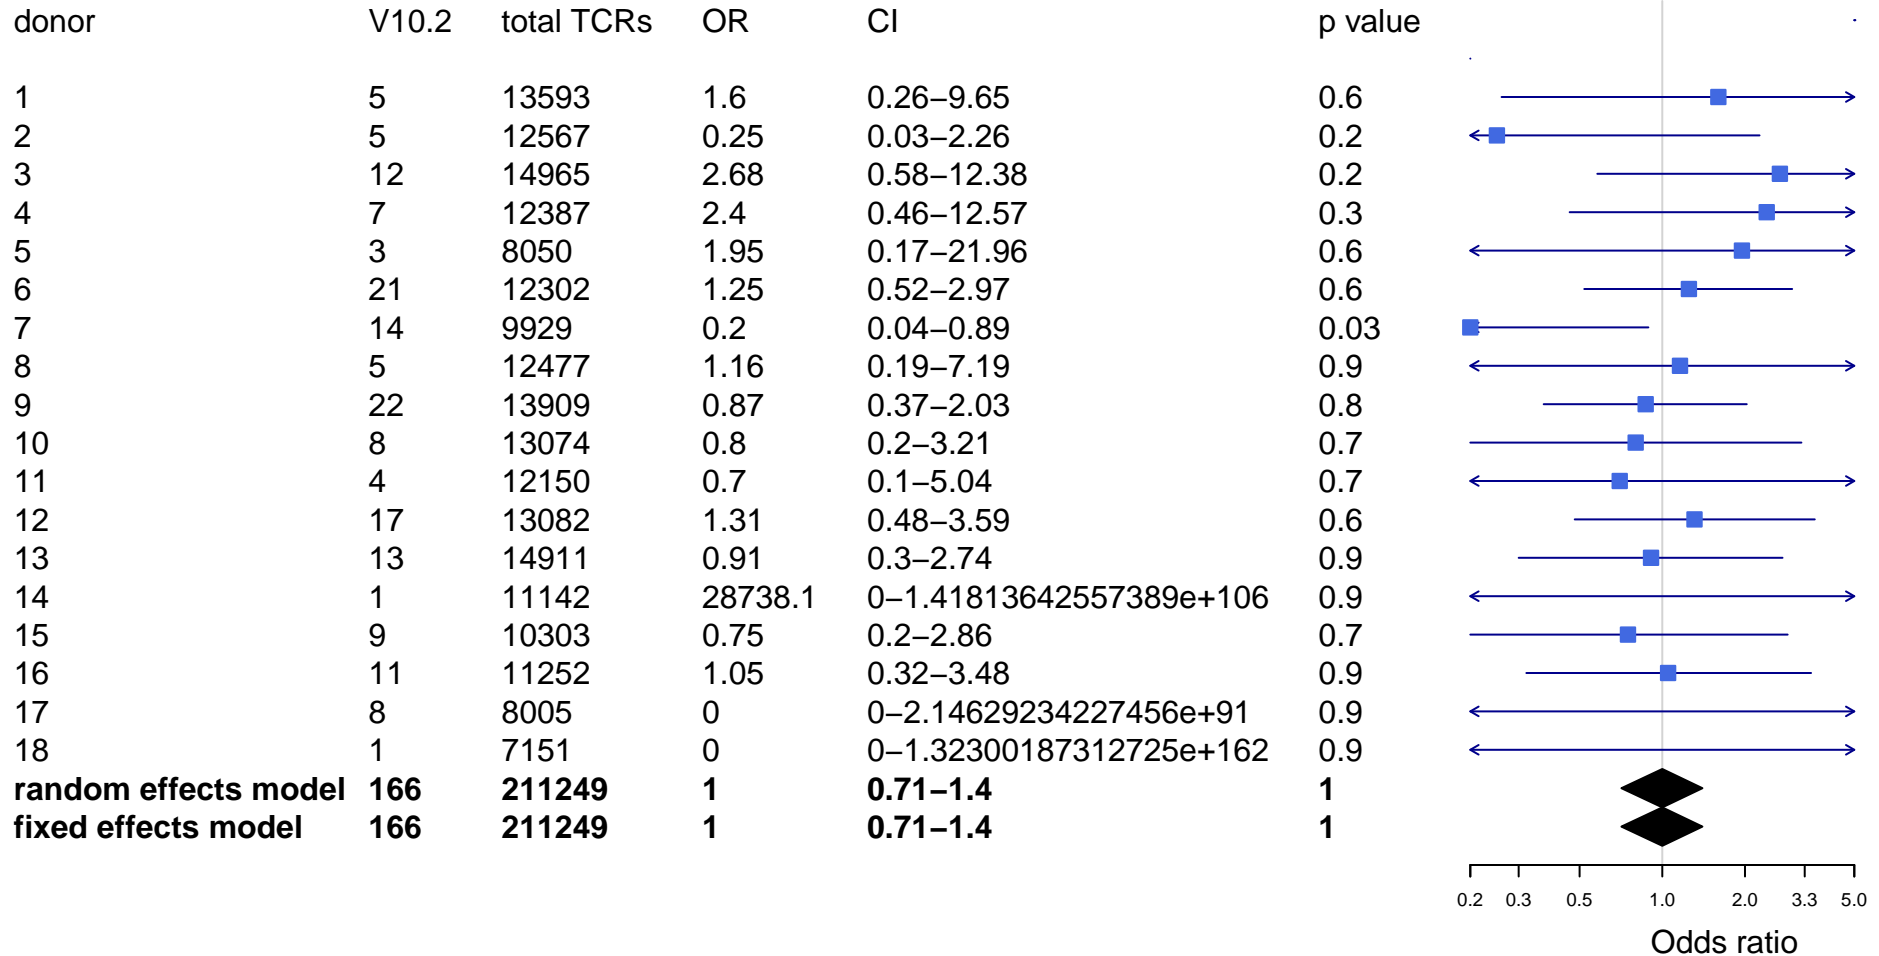

# Propensity for Vbeta5.7

| donor                       | V5.7        | total TCRs    | OR          | CI               | p value      |
|-----------------------------|-------------|---------------|-------------|------------------|--------------|
| 1                           | 18          | 13593         | 0.77        | 0.29–1.99        | 0.6          |
| 2                           | 10          | 12567         | 2.11        | 0.54–8.22        | 0.3          |
| 3                           | 77          | 14965         | 9.65        | 3.52–26.48       | 1e-05        |
| 4                           | 17          | 12387         | 0.55        | 0.2–1.51         | 0.3          |
| 5                           | 9           | 8050          | 1.05        | 0.28–3.95        | 0.9          |
| 6                           | 25          | 12302         | 0.47        | 0.21–1.07        | 0.07         |
| 7                           | 205         | 9929          | 0.79        | 0.59–1.05        | 0.1          |
| 8                           | 9           | 12477         | 1.41        | 0.38–5.3         | 0.6          |
| 9                           | 20          | 13909         | 0.6         | 0.24–1.51        | 0.3          |
| 10                          | 226         | 13074         | 0.96        | 0.74–1.25        | 0.8          |
| 11                          | 188         | 12150         | 0.98        | 0.73–1.32        | 0.9          |
| 12                          | 93          | 13082         | 1.21        | 0.79–1.85        | 0.4          |
| 13                          | 240         | 14911         | 0.93        | 0.72–1.2         | 0.6          |
| 14                          | 172         | 11142         | 0.68        | 0.5–0.92         | 0.01         |
| 15                          | 208         | 10303         | 0.54        | 0.41–0.72        | 2e-05        |
| 16                          | 221         | 11252         | 1.07        | 0.82–1.4         | 0.6          |
| 17                          | 158         | 8005          | 0.8         | 0.58–1.11        | 0.2          |
| 18                          | 129         | 7151          | 0.69        | 0.46–1.04        | 0.08         |
| <b>random effects model</b> | <b>2025</b> | <b>211249</b> | <b>0.88</b> | <b>0.74–1.05</b> | <b>0.2</b>   |
| <b>fixed effects model</b>  | <b>2025</b> | <b>211249</b> | <b>0.85</b> | <b>0.78–0.94</b> | <b>8e-04</b> |

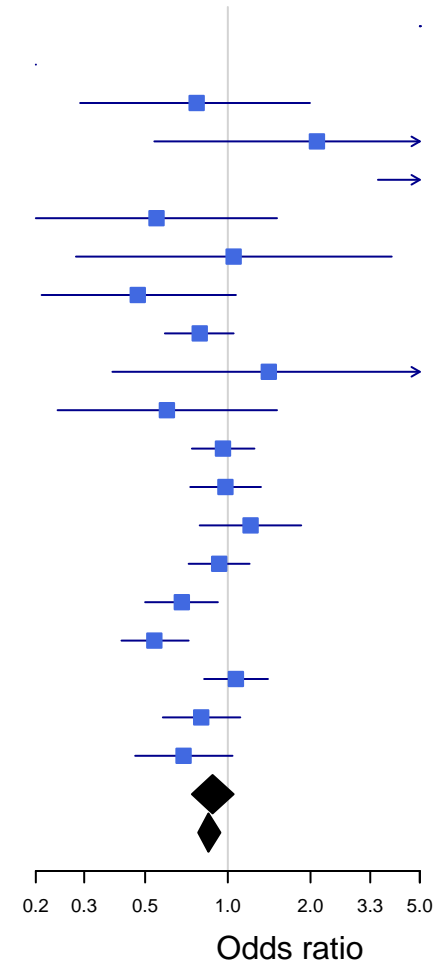

# Propensity for Vbeta4.2

| donor                       | V4.2        | total TCRs    | OR          | CI               | p value    |
|-----------------------------|-------------|---------------|-------------|------------------|------------|
| 1                           | 101         | 13593         | 0.48        | 0.31–0.75        | 0.001      |
| 2                           | 70          | 12567         | 0.64        | 0.39–1.03        | 0.07       |
| 3                           | 113         | 14965         | 0.77        | 0.53–1.13        | 0.2        |
| 4                           | 97          | 12387         | 1.59        | 1.06–2.4         | 0.03       |
| 5                           | 112         | 8050          | 0.62        | 0.42–0.91        | 0.01       |
| 6                           | 204         | 12302         | 0.91        | 0.69–1.2         | 0.5        |
| 7                           | 121         | 9929          | 0.56        | 0.38–0.81        | 0.003      |
| 8                           | 204         | 12477         | 0.78        | 0.59–1.03        | 0.08       |
| 9                           | 93          | 13909         | 1.23        | 0.81–1.85        | 0.3        |
| 10                          | 99          | 13074         | 1.76        | 1.15–2.69        | 0.009      |
| 11                          | 24          | 12150         | 0.54        | 0.24–1.22        | 0.1        |
| 12                          | 57          | 13082         | 1.4         | 0.8–2.45         | 0.2        |
| 13                          | 119         | 14911         | 0.97        | 0.67–1.4         | 0.9        |
| 14                          | 39          | 11142         | 3.82        | 1.67–8.74        | 0.001      |
| 15                          | 53          | 10303         | 1.95        | 1.07–3.54        | 0.03       |
| 16                          | 73          | 11252         | 2.22        | 1.33–3.7         | 0.002      |
| 17                          | 26          | 8005          | 0.05        | 0.01–0.37        | 0.003      |
| 18                          | 43          | 7151          | 0.48        | 0.26–0.91        | 0.02       |
| <b>random effects model</b> | <b>1648</b> | <b>211249</b> | <b>0.95</b> | <b>0.75–1.21</b> | <b>0.7</b> |
| <b>fixed effects model</b>  | <b>1648</b> | <b>211249</b> | <b>0.92</b> | <b>0.83–1.02</b> | <b>0.1</b> |

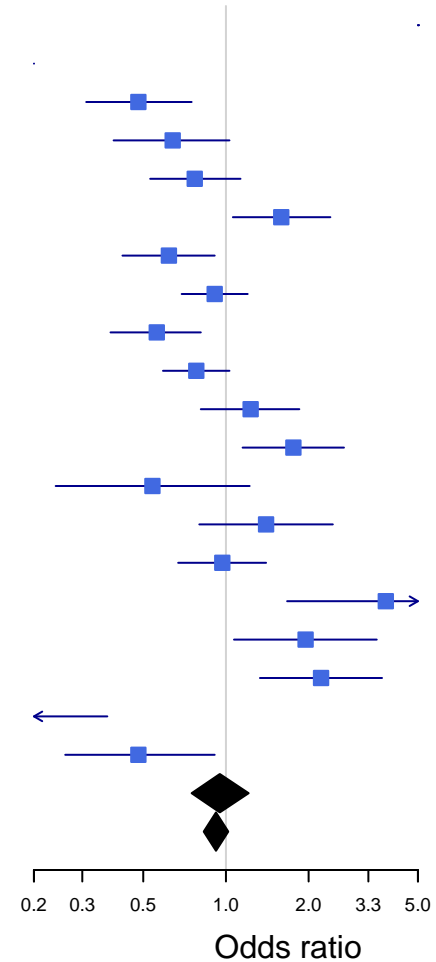



# Propensity for Vbeta29.1

| donor                       | V29.1        | total TCRs    | OR          | CI              | p value      |
|-----------------------------|--------------|---------------|-------------|-----------------|--------------|
| 1                           | 3180         | 13593         | 0.81        | 0.75–0.88       | 4e-07        |
| 2                           | 2755         | 12567         | 0.97        | 0.89–1.06       | 0.5          |
| 3                           | 2319         | 14965         | 0.94        | 0.86–1.04       | 0.2          |
| 4                           | 2009         | 12387         | 1.22        | 1.11–1.34       | 6e-05        |
| 5                           | 1432         | 8050          | 0.75        | 0.67–0.84       | 1e-06        |
| 6                           | 1503         | 12302         | 0.67        | 0.6–0.75        | 9e-13        |
| 7                           | 1871         | 9929          | 1.25        | 1.13–1.39       | 2e-05        |
| 8                           | 2141         | 12477         | 0.99        | 0.9–1.09        | 0.8          |
| 9                           | 2599         | 13909         | 0.88        | 0.81–0.96       | 0.005        |
| 10                          | 3063         | 13074         | 0.89        | 0.82–0.97       | 0.006        |
| 11                          | 4612         | 12150         | 1.41        | 1.31–1.52       | 7e-19        |
| 12                          | 4926         | 13082         | 0.82        | 0.76–0.88       | 1e-07        |
| 13                          | 2575         | 14911         | 0.7         | 0.64–0.76       | 2e-16        |
| 14                          | 4714         | 11142         | 0.37        | 0.34–0.4        | <1e-100      |
| 15                          | 2169         | 10303         | 0.81        | 0.74–0.89       | 2e-05        |
| 16                          | 2973         | 11252         | 0.81        | 0.74–0.88       | 1e-06        |
| 17                          | 2910         | 8005          | 2.44        | 2.22–2.68       | 7e-75        |
| 18                          | 2105         | 7151          | 3.45        | 2.93–4.06       | 2e-49        |
| <b>random effects model</b> | <b>49856</b> | <b>211249</b> | <b>0.98</b> | <b>0.8–1.2</b>  | <b>0.9</b>   |
| <b>fixed effects model</b>  | <b>49856</b> | <b>211249</b> | <b>0.92</b> | <b>0.9–0.94</b> | <b>4e-14</b> |

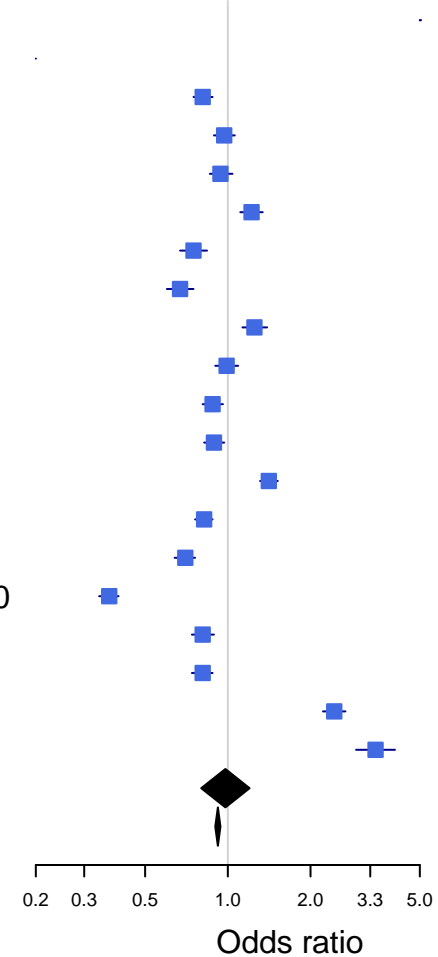

# Propensity for Vbeta19

| donor                       | V19          | total TCRs    | OR          | CI               | p value      |
|-----------------------------|--------------|---------------|-------------|------------------|--------------|
| 1                           | 1400         | 13593         | 1.27        | 1.14–1.42        | 3e-05        |
| 2                           | 1306         | 12567         | 1.47        | 1.3–1.65         | 2e-10        |
| 3                           | 2132         | 14965         | 0.77        | 0.7–0.85         | 7e-08        |
| 4                           | 1245         | 12387         | 1.12        | 1–1.26           | 0.06         |
| 5                           | 820          | 8050          | 0.82        | 0.71–0.95        | 0.007        |
| 6                           | 1406         | 12302         | 0.76        | 0.68–0.85        | 2e-06        |
| 7                           | 840          | 9929          | 1.19        | 1.03–1.38        | 0.02         |
| 8                           | 1324         | 12477         | 1.2         | 1.07–1.35        | 0.002        |
| 9                           | 1552         | 13909         | 0.84        | 0.76–0.94        | 0.002        |
| 10                          | 1437         | 13074         | 0.52        | 0.46–0.58        | 1e-29        |
| 11                          | 1095         | 12150         | 0.86        | 0.76–0.98        | 0.02         |
| 12                          | 1382         | 13082         | 1.26        | 1.12–1.42        | 9e-05        |
| 13                          | 1683         | 14911         | 1.08        | 0.97–1.2         | 0.2          |
| 14                          | 1163         | 11142         | 1.01        | 0.89–1.14        | 0.9          |
| 15                          | 1556         | 10303         | 0.65        | 0.58–0.73        | 3e-14        |
| 16                          | 1004         | 11252         | 1.02        | 0.89–1.16        | 0.8          |
| 17                          | 726          | 8005          | 0.74        | 0.63–0.87        | 2e-04        |
| 18                          | 1027         | 7151          | 1.45        | 1.2–1.74         | 8e-05        |
| <b>random effects model</b> | <b>23098</b> | <b>211249</b> | <b>0.96</b> | <b>0.84–1.1</b>  | <b>0.6</b>   |
| <b>fixed effects model</b>  | <b>23098</b> | <b>211249</b> | <b>0.95</b> | <b>0.92–0.97</b> | <b>1e-04</b> |

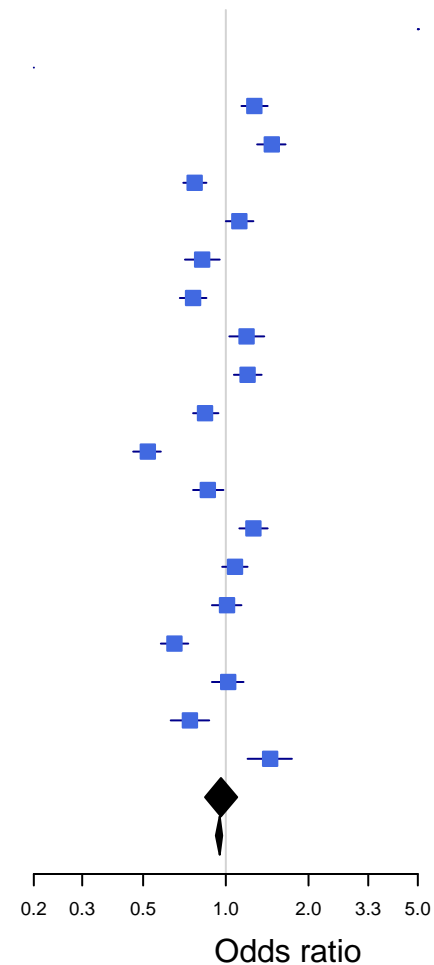

# Propensity for Vbeta6.4

| donor                       | V6.4       | total TCRs    | OR          | CI                     | p value    |
|-----------------------------|------------|---------------|-------------|------------------------|------------|
| 1                           | 28         | 13593         | 1.27        | 0.6–2.68               | 0.5        |
| 2                           | 23         | 12567         | 1.61        | 0.7–3.74               | 0.3        |
| 3                           | 30         | 14965         | 1.21        | 0.55–2.66              | 0.6        |
| 4                           | 32         | 12387         | 1.11        | 0.55–2.24              | 0.8        |
| 5                           | 17         | 8050          | 0.72        | 0.28–1.89              | 0.5        |
| 6                           | 23         | 12302         | 1.36        | 0.58–3.16              | 0.5        |
| 7                           | 18         | 9929          | 1.79        | 0.69–4.65              | 0.2        |
| 8                           | 21         | 12477         | 1.27        | 0.53–3.06              | 0.6        |
| 9                           | 24         | 13909         | 0.9         | 0.4–2.03               | 0.8        |
| 10                          | 13         | 13074         | 258158.58   | 0–1.73316717105453e+81 | 0.9        |
| 11                          | 20         | 12150         | 0.64        | 0.26–1.56              | 0.3        |
| 12                          | 31         | 13082         | 0.79        | 0.38–1.6               | 0.5        |
| 13                          | 29         | 14911         | 1.15        | 0.55–2.42              | 0.7        |
| 14                          | 25         | 11142         | 2.13        | 0.88–5.17              | 0.09       |
| 15                          | 23         | 10303         | 0.74        | 0.32–1.71              | 0.5        |
| 16                          | 17         | 11252         | 0.83        | 0.32–2.16              | 0.7        |
| 17                          | 14         | 8005          | 0.2         | 0.05–0.92              | 0.04       |
| 18                          | 33         | 7151          | 0.14        | 0.07–0.3               | 1e–07      |
| <b>random effects model</b> | <b>421</b> | <b>211249</b> | <b>0.91</b> | <b>0.66–1.26</b>       | <b>0.6</b> |
| <b>fixed effects model</b>  | <b>421</b> | <b>211249</b> | <b>0.91</b> | <b>0.74–1.11</b>       | <b>0.3</b> |

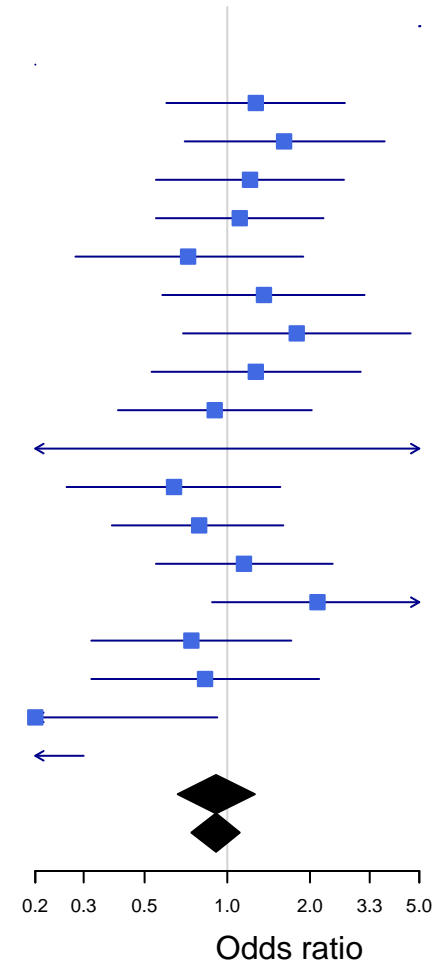

# Propensity for Vbeta28

| donor                       | V28         | total TCRs    | OR          | CI               | p value    |
|-----------------------------|-------------|---------------|-------------|------------------|------------|
| 1                           | 26          | 13593         | 1           | 0.46–2.18        | 1          |
| 2                           | 212         | 12567         | 0.93        | 0.71–1.22        | 0.6        |
| 3                           | 18          | 14965         | 1.97        | 0.64–6.05        | 0.2        |
| 4                           | 140         | 12387         | 1.17        | 0.83–1.63        | 0.4        |
| 5                           | 96          | 8050          | 0.94        | 0.63–1.42        | 0.8        |
| 6                           | 192         | 12302         | 0.75        | 0.56–1           | 0.05       |
| 7                           | 98          | 9929          | 0.94        | 0.62–1.4         | 0.7        |
| 8                           | 258         | 12477         | 1.14        | 0.89–1.46        | 0.3        |
| 9                           | 20          | 13909         | 0.82        | 0.34–2           | 0.7        |
| 10                          | 422         | 13074         | 1.24        | 1.01–1.51        | 0.04       |
| 11                          | 242         | 12150         | 1.27        | 0.98–1.65        | 0.08       |
| 12                          | 92          | 13082         | 1.27        | 0.83–1.95        | 0.3        |
| 13                          | 132         | 14911         | 1.27        | 0.89–1.81        | 0.2        |
| 14                          | 22          | 11142         | 5.29        | 1.55–18.02       | 0.008      |
| 15                          | 16          | 10303         | 2.89        | 0.93–9.02        | 0.07       |
| 16                          | 183         | 11252         | 0.78        | 0.58–1.05        | 0.1        |
| 17                          | 135         | 8005          | 0.13        | 0.07–0.23        | 4e-12      |
| 18                          | 45          | 7151          | 0.6         | 0.31–1.15        | 0.1        |
| <b>random effects model</b> | <b>2349</b> | <b>211249</b> | <b>0.98</b> | <b>0.79–1.2</b>  | <b>0.8</b> |
| <b>fixed effects model</b>  | <b>2349</b> | <b>211249</b> | <b>1.02</b> | <b>0.93–1.11</b> | <b>0.7</b> |

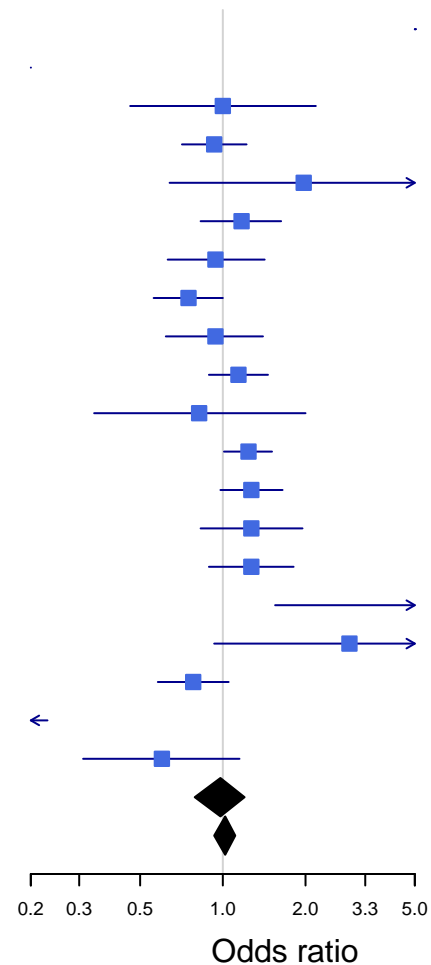

# Propensity for Vbeta11.1

| donor                       | V11.1       | total TCRs    | OR          | CI               | p value    |
|-----------------------------|-------------|---------------|-------------|------------------|------------|
| 1                           | 155         | 13593         | 1           | 0.72–1.37        | 1          |
| 2                           | 114         | 12567         | 0.71        | 0.49–1.04        | 0.08       |
| 3                           | 114         | 14965         | 0.81        | 0.55–1.18        | 0.3        |
| 4                           | 123         | 12387         | 1.58        | 1.1–2.28         | 0.01       |
| 5                           | 75          | 8050          | 1.6         | 1–2.58           | 0.05       |
| 6                           | 168         | 12302         | 0.72        | 0.53–0.98        | 0.04       |
| 7                           | 104         | 9929          | 0.5         | 0.33–0.76        | 0.001      |
| 8                           | 134         | 12477         | 1.11        | 0.79–1.58        | 0.5        |
| 9                           | 149         | 13909         | 0.8         | 0.58–1.11        | 0.2        |
| 10                          | 137         | 13074         | 1.56        | 1.09–2.21        | 0.01       |
| 11                          | 82          | 12150         | 0.91        | 0.59–1.41        | 0.7        |
| 12                          | 94          | 13082         | 1.33        | 0.87–2.03        | 0.2        |
| 13                          | 204         | 14911         | 0.85        | 0.65–1.13        | 0.3        |
| 14                          | 128         | 11142         | 0.84        | 0.59–1.2         | 0.3        |
| 15                          | 102         | 10303         | 1.43        | 0.95–2.13        | 0.08       |
| 16                          | 93          | 11252         | 0.97        | 0.64–1.46        | 0.9        |
| 17                          | 49          | 8005          | 3.42        | 1.8–6.49         | 2e-04      |
| 18                          | 62          | 7151          | 0.85        | 0.47–1.53        | 0.6        |
| <b>random effects model</b> | <b>2087</b> | <b>211249</b> | <b>1.03</b> | <b>0.87–1.21</b> | <b>0.8</b> |
| <b>fixed effects model</b>  | <b>2087</b> | <b>211249</b> | <b>0.99</b> | <b>0.91–1.08</b> | <b>0.8</b> |

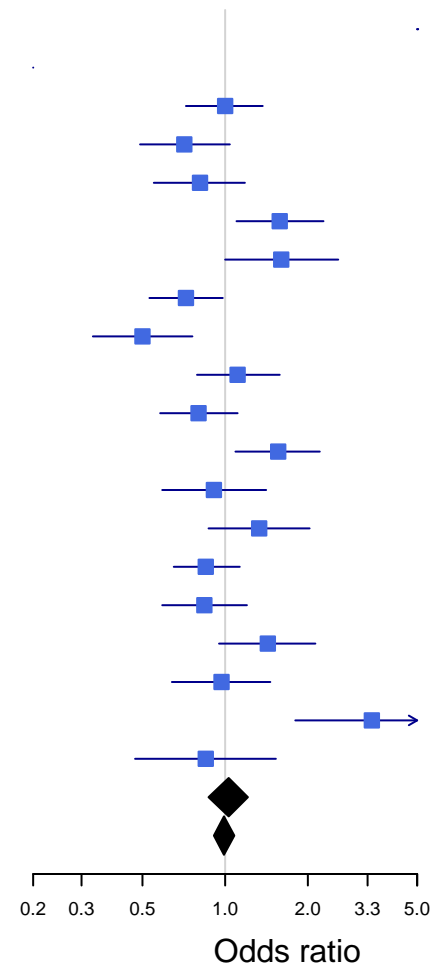

# Propensity for Vbeta6.9

| donor                       | V6.9       | total TCRs    | OR          | CI                      | p value    |
|-----------------------------|------------|---------------|-------------|-------------------------|------------|
| 1                           | 44         | 13593         | 1.37        | 0.75–2.48               | 0.3        |
| 2                           | 50         | 12567         | 1.3         | 0.74–2.3                | 0.4        |
| 3                           | 81         | 14965         | 1.03        | 0.64–1.64               | 0.9        |
| 4                           | 32         | 12387         | 0.7         | 0.34–1.41               | 0.3        |
| 5                           | 39         | 8050          | 1.15        | 0.61–2.19               | 0.7        |
| 6                           | 57         | 12302         | 1.24        | 0.73–2.11               | 0.4        |
| 7                           | 50         | 9929          | 0.93        | 0.53–1.64               | 0.8        |
| 8                           | 43         | 12477         | 0.73        | 0.39–1.34               | 0.3        |
| 9                           | 48         | 13909         | 1.65        | 0.92–2.95               | 0.09       |
| 10                          | 47         | 13074         | 0.72        | 0.4–1.29                | 0.3        |
| 11                          | 16         | 12150         | 0.33        | 0.11–0.96               | 0.04       |
| 12                          | 26         | 13082         | 1.42        | 0.61–3.29               | 0.4        |
| 13                          | 70         | 14911         | 1.16        | 0.72–1.88               | 0.5        |
| 14                          | 17         | 11142         | 4.09        | 1.16–14.35              | 0.03       |
| 15                          | 22         | 10303         | 0.87        | 0.37–2.02               | 0.7        |
| 16                          | 12         | 11252         | 1.78        | 0.53–5.98               | 0.4        |
| 17                          | 3          | 8005          | 157668.69   | 0–6.46557105627354e+101 | 0.9        |
| 18                          | 7          | 7151          | 0.57        | 0.11–2.98               | 0.5        |
| <b>random effects model</b> | <b>664</b> | <b>211249</b> | <b>1.07</b> | <b>0.9–1.27</b>         | <b>0.5</b> |
| <b>fixed effects model</b>  | <b>664</b> | <b>211249</b> | <b>1.07</b> | <b>0.91–1.25</b>        | <b>0.4</b> |

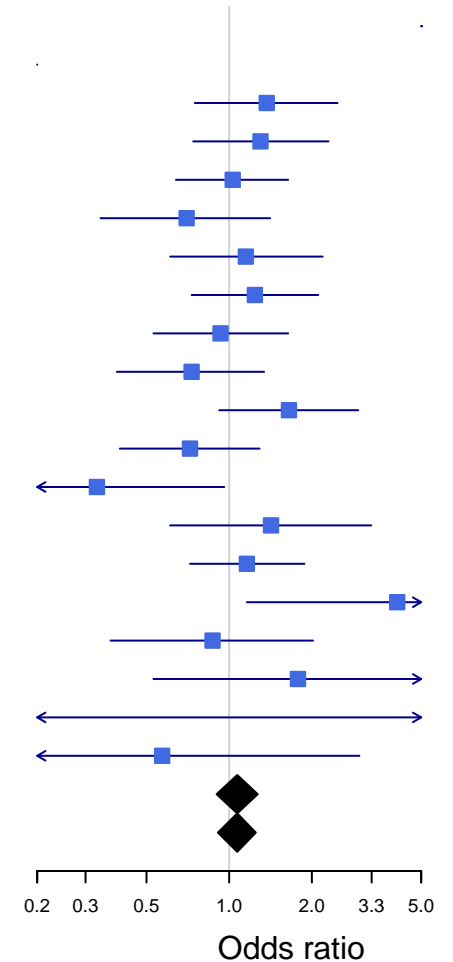

# Propensity for Vbeta5.5

| donor                       | V5.5        | total TCRs    | OR          | CI               | p value      |
|-----------------------------|-------------|---------------|-------------|------------------|--------------|
| 1                           | 618         | 13593         | 1.01        | 0.85–1.19        | 0.9          |
| 2                           | 322         | 12567         | 1.17        | 0.94–1.46        | 0.2          |
| 3                           | 382         | 14965         | 0.86        | 0.7–1.07         | 0.2          |
| 4                           | 593         | 12387         | 0.97        | 0.82–1.15        | 0.7          |
| 5                           | 301         | 8050          | 1.78        | 1.39–2.27        | 4e–06        |
| 6                           | 449         | 12302         | 1.24        | 1.02–1.5         | 0.03         |
| 7                           | 142         | 9929          | 1.03        | 0.74–1.45        | 0.8          |
| 8                           | 290         | 12477         | 0.89        | 0.7–1.13         | 0.3          |
| 9                           | 617         | 13909         | 1.47        | 1.25–1.73        | 4e–06        |
| 10                          | 161         | 13074         | 1.12        | 0.82–1.54        | 0.5          |
| 11                          | 94          | 12150         | 1.19        | 0.78–1.8         | 0.4          |
| 12                          | 108         | 13082         | 1.75        | 1.15–2.66        | 0.009        |
| 13                          | 180         | 14911         | 1.32        | 0.97–1.79        | 0.07         |
| 14                          | 101         | 11142         | 1.73        | 1.13–2.65        | 0.01         |
| 15                          | 123         | 10303         | 0.66        | 0.46–0.95        | 0.03         |
| 16                          | 117         | 11252         | 1.63        | 1.11–2.39        | 0.01         |
| 17                          | 94          | 8005          | 0.66        | 0.43–1.02        | 0.06         |
| 18                          | 90          | 7151          | 0.96        | 0.57–1.6         | 0.9          |
| <b>random effects model</b> | <b>4782</b> | <b>211249</b> | <b>1.14</b> | <b>1.01–1.29</b> | <b>0.04</b>  |
| <b>fixed effects model</b>  | <b>4782</b> | <b>211249</b> | <b>1.14</b> | <b>1.07–1.2</b>  | <b>3e–05</b> |

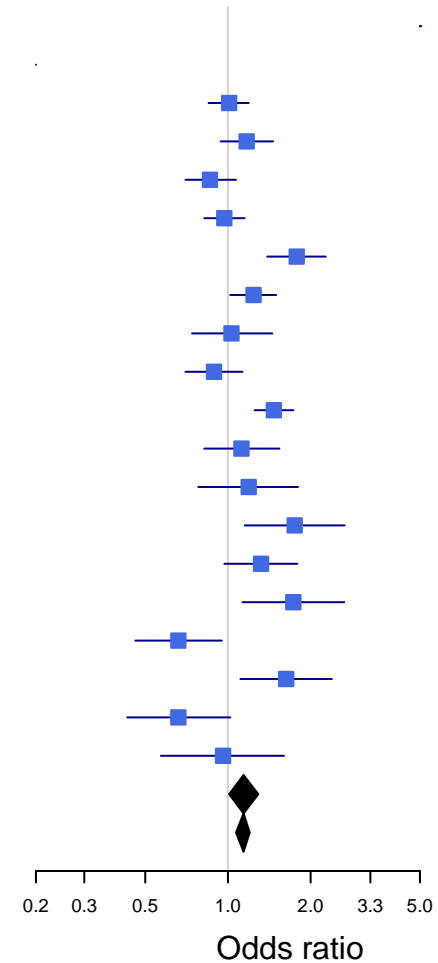

# Propensity for Vbeta2

| donor                       | V2          | total TCRs    | OR          | CI               | p value      |
|-----------------------------|-------------|---------------|-------------|------------------|--------------|
| 1                           | 309         | 13593         | 1.02        | 0.81–1.29        | 0.8          |
| 2                           | 201         | 12567         | 1.34        | 1.01–1.78        | 0.05         |
| 3                           | 202         | 14965         | 1.07        | 0.79–1.43        | 0.7          |
| 4                           | 227         | 12387         | 1.39        | 1.06–1.82        | 0.02         |
| 5                           | 150         | 8050          | 1.18        | 0.85–1.64        | 0.3          |
| 6                           | 195         | 12302         | 0.83        | 0.62–1.1         | 0.2          |
| 7                           | 136         | 9929          | 1.03        | 0.73–1.45        | 0.9          |
| 8                           | 133         | 12477         | 0.94        | 0.66–1.32        | 0.7          |
| 9                           | 189         | 13909         | 1.07        | 0.8–1.43         | 0.6          |
| 10                          | 254         | 13074         | 1.6         | 1.23–2.08        | 5e-04        |
| 11                          | 151         | 12150         | 0.95        | 0.69–1.32        | 0.8          |
| 12                          | 123         | 13082         | 0.94        | 0.65–1.35        | 0.7          |
| 13                          | 248         | 14911         | 1.14        | 0.88–1.48        | 0.3          |
| 14                          | 145         | 11142         | 3.78        | 2.44–5.85        | 2e-09        |
| 15                          | 230         | 10303         | 1.56        | 1.19–2.06        | 0.001        |
| 16                          | 158         | 11252         | 2.11        | 1.49–2.99        | 2e-05        |
| 17                          | 72          | 8005          | 0.1         | 0.04–0.24        | 1e-07        |
| 18                          | 102         | 7151          | 0.54        | 0.35–0.83        | 0.004        |
| <b>random effects model</b> | <b>3225</b> | <b>211249</b> | <b>1.12</b> | <b>0.92–1.35</b> | <b>0.3</b>   |
| <b>fixed effects model</b>  | <b>3225</b> | <b>211249</b> | <b>1.17</b> | <b>1.09–1.26</b> | <b>2e-05</b> |

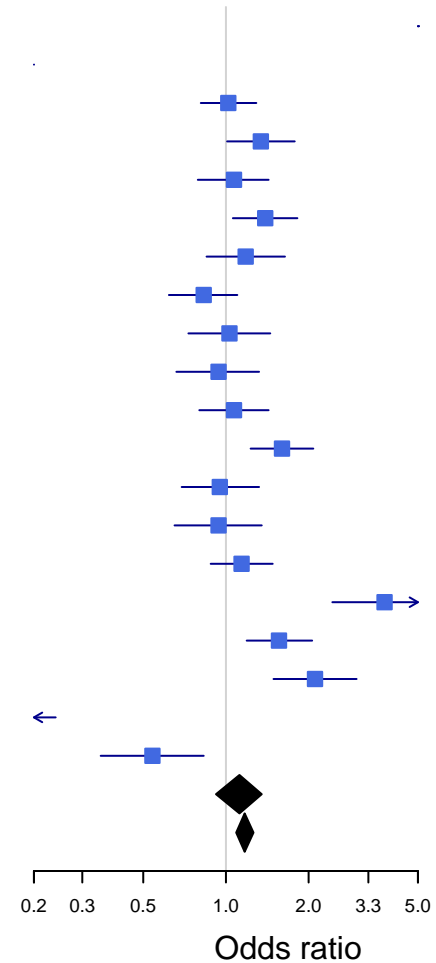



# Propensity for Vbeta23.1

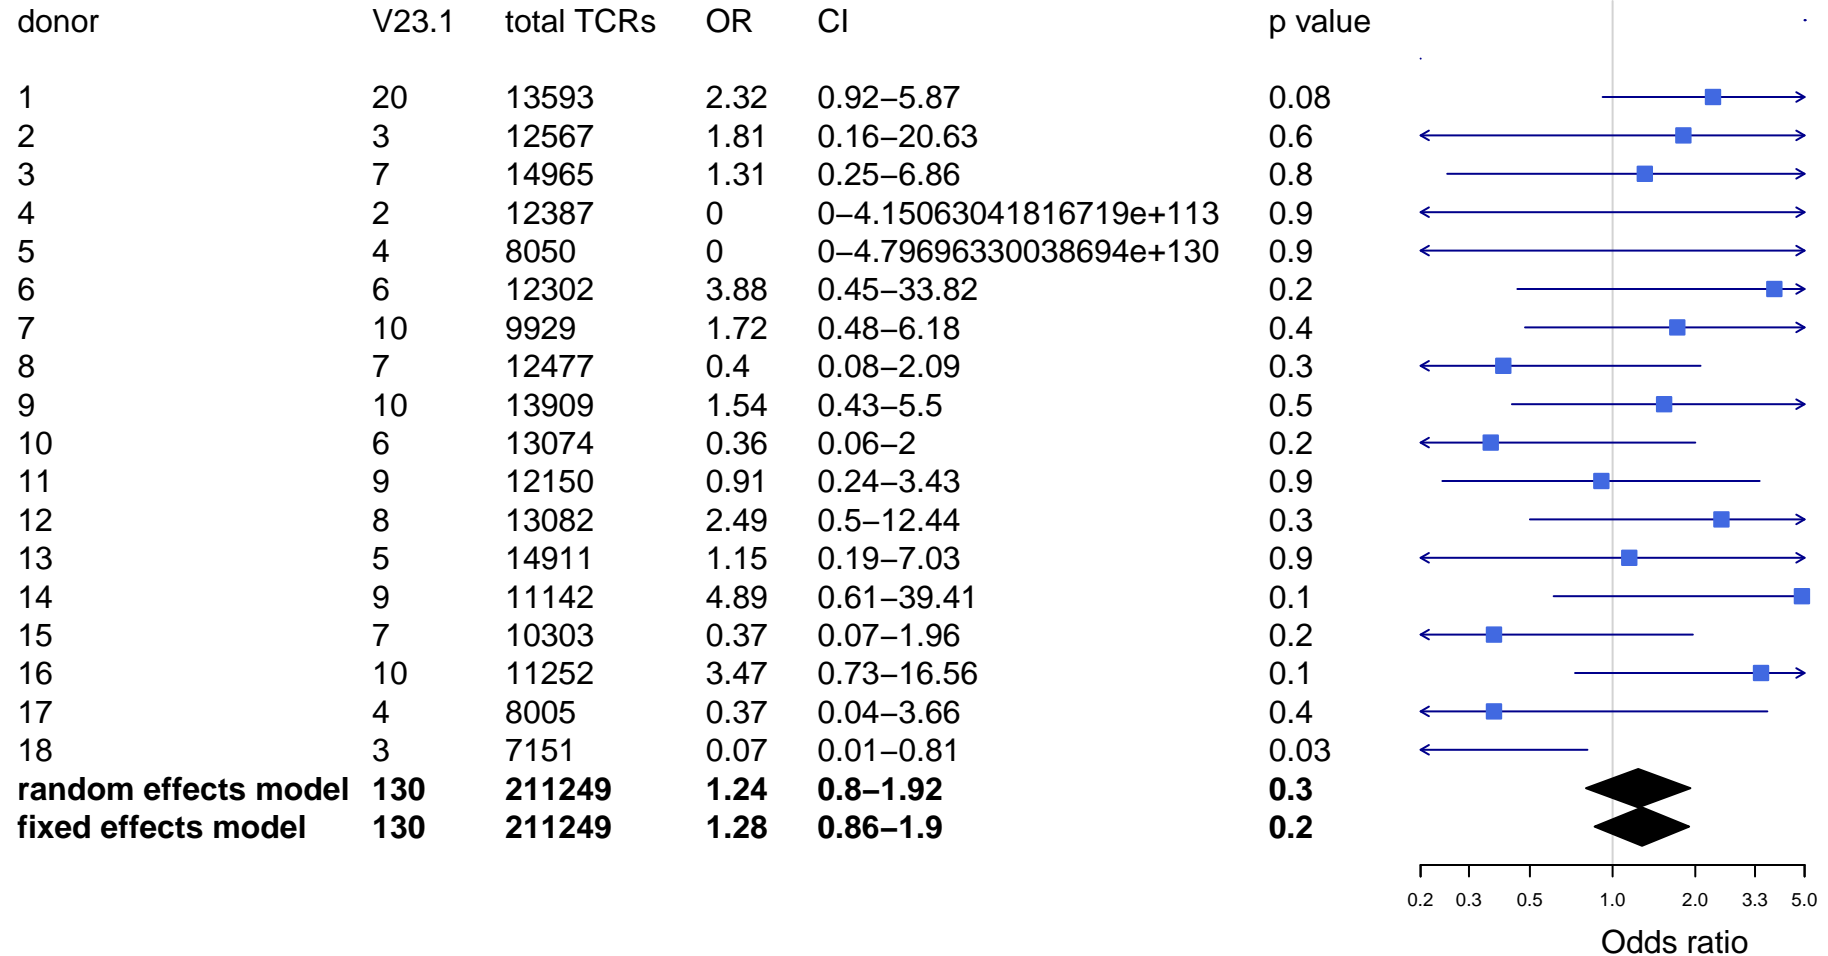

# Propensity for Vbeta6.5

| donor                       | V6.5         | total TCRs    | OR          | CI               | p value      |
|-----------------------------|--------------|---------------|-------------|------------------|--------------|
| 1                           | 944          | 13593         | 1.39        | 1.22–1.59        | 1e-06        |
| 2                           | 1038         | 12567         | 1.21        | 1.06–1.37        | 0.004        |
| 3                           | 1655         | 14965         | 0.96        | 0.86–1.07        | 0.4          |
| 4                           | 822          | 12387         | 1.01        | 0.88–1.17        | 0.9          |
| 5                           | 640          | 8050          | 1.05        | 0.89–1.23        | 0.6          |
| 6                           | 1281         | 12302         | 1.13        | 1.01–1.28        | 0.03         |
| 7                           | 946          | 9929          | 1.08        | 0.94–1.23        | 0.3          |
| 8                           | 1072         | 12477         | 1.15        | 1.02–1.31        | 0.03         |
| 9                           | 990          | 13909         | 1.61        | 1.41–1.83        | 2e-12        |
| 10                          | 800          | 13074         | 1.76        | 1.51–2.05        | 5e-13        |
| 11                          | 1092         | 12150         | 0.94        | 0.83–1.07        | 0.4          |
| 12                          | 1141         | 13082         | 1.46        | 1.28–1.66        | 9e-09        |
| 13                          | 1581         | 14911         | 1.22        | 1.1–1.36         | 3e-04        |
| 14                          | 786          | 11142         | 1.79        | 1.53–2.1         | 4e-13        |
| 15                          | 951          | 10303         | 1.45        | 1.26–1.67        | 1e-07        |
| 16                          | 643          | 11252         | 0.82        | 0.7–0.96         | 0.02         |
| 17                          | 372          | 8005          | 0.97        | 0.79–1.2         | 0.8          |
| 18                          | 456          | 7151          | 1.89        | 1.41–2.54        | 2e-05        |
| <b>random effects model</b> | <b>17210</b> | <b>211249</b> | <b>1.23</b> | <b>1.11–1.36</b> | <b>8e-05</b> |
| <b>fixed effects model</b>  | <b>17210</b> | <b>211249</b> | <b>1.21</b> | <b>1.17–1.25</b> | <b>3e-30</b> |

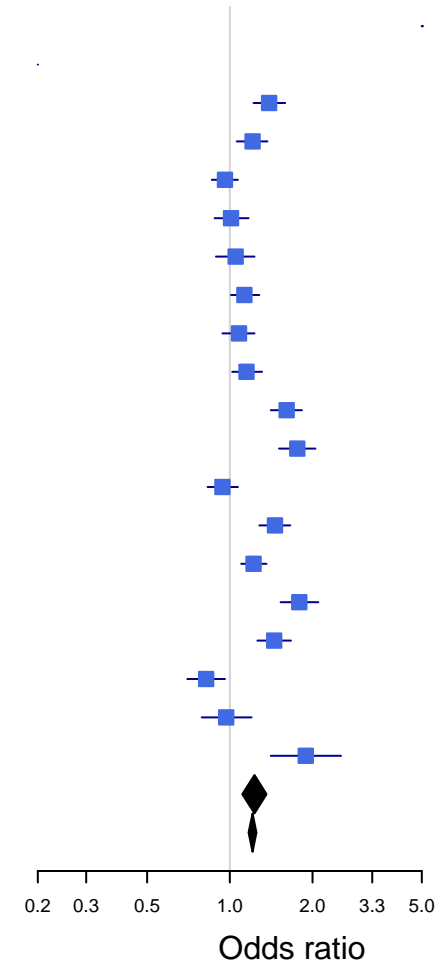

# Propensity for Vbeta11.3

| donor                       | V11.3      | total TCRs    | OR          | CI                      | p value     |
|-----------------------------|------------|---------------|-------------|-------------------------|-------------|
| 1                           | 20         | 13593         | 1.03        | 0.42–2.49               | 1           |
| 2                           | 108        | 12567         | 1.79        | 1.2–2.66                | 0.004       |
| 3                           | 167        | 14965         | 1.16        | 0.83–1.62               | 0.4         |
| 4                           | 12         | 12387         | 1.95        | 0.58–6.59               | 0.3         |
| 5                           | 8          | 8050          | 3.26        | 0.65–16.35              | 0.2         |
| 6                           | 23         | 12302         | 0.56        | 0.24–1.3                | 0.2         |
| 7                           | 17         | 9929          | 1.53        | 0.58–4.07               | 0.4         |
| 8                           | 110        | 12477         | 1.45        | 0.99–2.14               | 0.06        |
| 9                           | 17         | 13909         | 1.3         | 0.5–3.38                | 0.6         |
| 10                          | 28         | 13074         | 1.43        | 0.67–3.07               | 0.4         |
| 11                          | 10         | 12150         | 0.61        | 0.17–2.19               | 0.5         |
| 12                          | 7          | 13082         | 4.72        | 0.56–39.63              | 0.2         |
| 13                          | 16         | 14911         | 0.89        | 0.33–2.39               | 0.8         |
| 14                          | 19         | 11142         | 1.89        | 0.71–5.02               | 0.2         |
| 15                          | 14         | 10303         | 0.91        | 0.31–2.62               | 0.9         |
| 16                          | 6          | 11252         | 235622.57   | 0–2.55225290376919e+116 | 0.9         |
| 17                          | 6          | 8005          | 1.55        | 0.31–7.69               | 0.6         |
| 18                          | 106        | 7151          | 0.68        | 0.44–1.04               | 0.08        |
| <b>random effects model</b> | <b>694</b> | <b>211249</b> | <b>1.21</b> | <b>0.99–1.48</b>        | <b>0.07</b> |
| <b>fixed effects model</b>  | <b>694</b> | <b>211249</b> | <b>1.21</b> | <b>1.03–1.42</b>        | <b>0.02</b> |

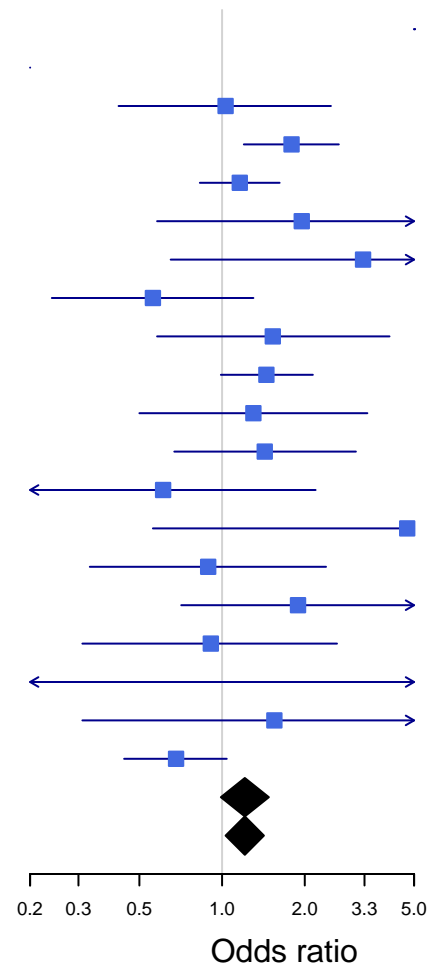

# Propensity for Vbeta6.1

| donor                       | V6.1        | total TCRs    | OR          | CI               | p value      |
|-----------------------------|-------------|---------------|-------------|------------------|--------------|
| 1                           | 340         | 13593         | 1.08        | 0.87–1.34        | 0.5          |
| 2                           | 197         | 12567         | 1.86        | 1.38–2.51        | 5e–05        |
| 3                           | 210         | 14965         | 1.03        | 0.77–1.37        | 0.9          |
| 4                           | 364         | 12387         | 1.5         | 1.21–1.86        | 2e–04        |
| 5                           | 189         | 8050          | 1.37        | 1.02–1.85        | 0.04         |
| 6                           | 281         | 12302         | 1.75        | 1.36–2.25        | 1e–05        |
| 7                           | 95          | 9929          | 1.07        | 0.71–1.61        | 0.8          |
| 8                           | 163         | 12477         | 1.01        | 0.74–1.39        | 0.9          |
| 9                           | 386         | 13909         | 1.4         | 1.14–1.72        | 0.001        |
| 10                          | 156         | 13074         | 0.93        | 0.68–1.28        | 0.7          |
| 11                          | 91          | 12150         | 1.22        | 0.79–1.87        | 0.4          |
| 12                          | 115         | 13082         | 1.12        | 0.77–1.64        | 0.6          |
| 13                          | 264         | 14911         | 1.05        | 0.82–1.35        | 0.7          |
| 14                          | 101         | 11142         | 1.05        | 0.7–1.56         | 0.8          |
| 15                          | 182         | 10303         | 1.52        | 1.12–2.06        | 0.008        |
| 16                          | 109         | 11252         | 1.79        | 1.19–2.69        | 0.005        |
| 17                          | 96          | 8005          | 1.38        | 0.92–2.08        | 0.1          |
| 18                          | 74          | 7151          | 0.41        | 0.26–0.67        | 4e–04        |
| <b>random effects model</b> | <b>3413</b> | <b>211249</b> | <b>1.22</b> | <b>1.07–1.39</b> | <b>0.003</b> |
| <b>fixed effects model</b>  | <b>3413</b> | <b>211249</b> | <b>1.26</b> | <b>1.17–1.35</b> | <b>1e–10</b> |

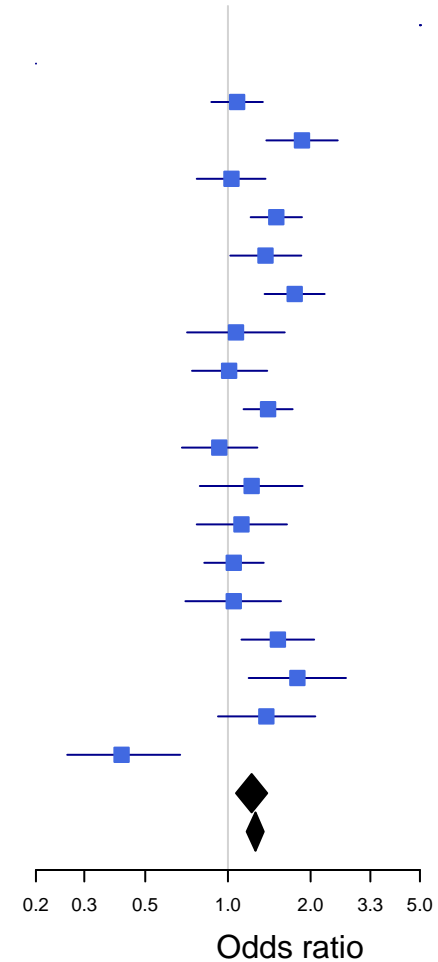

# Propensity for Vbeta6.8

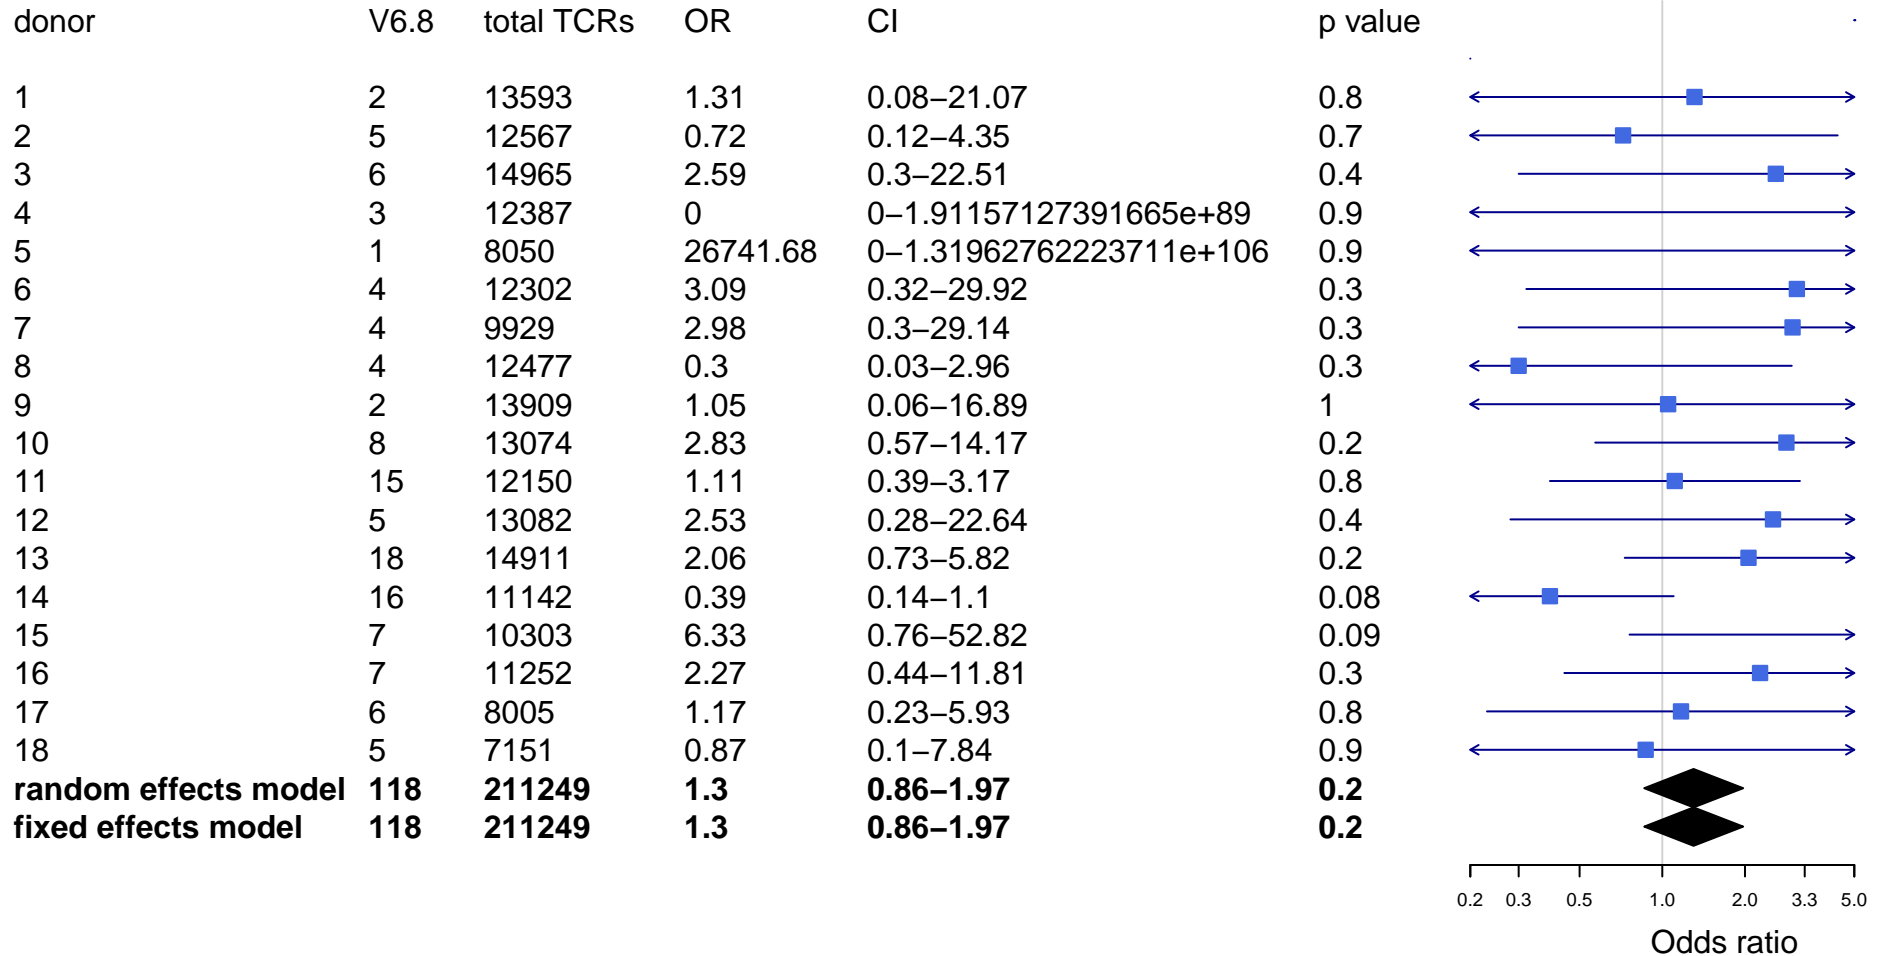

# Propensity for Vbeta25.1

| donor                       | V25.1      | total TCRs    | OR          | CI               | p value      |
|-----------------------------|------------|---------------|-------------|------------------|--------------|
| 1                           | 46         | 13593         | 1.34        | 0.74–2.4         | 0.3          |
| 2                           | 41         | 12567         | 0.58        | 0.31–1.09        | 0.09         |
| 3                           | 37         | 14965         | 0.9         | 0.46–1.77        | 0.8          |
| 4                           | 28         | 12387         | 1.51        | 0.71–3.21        | 0.3          |
| 5                           | 17         | 8050          | 1.57        | 0.58–4.28        | 0.4          |
| 6                           | 23         | 12302         | 0.62        | 0.27–1.43        | 0.3          |
| 7                           | 35         | 9929          | 0.7         | 0.35–1.38        | 0.3          |
| 8                           | 91         | 12477         | 2.37        | 1.49–3.78        | 3e-04        |
| 9                           | 34         | 13909         | 1.78        | 0.89–3.56        | 0.1          |
| 10                          | 33         | 13074         | 1.16        | 0.58–2.32        | 0.7          |
| 11                          | 26         | 12150         | 1.5         | 0.66–3.37        | 0.3          |
| 12                          | 25         | 13082         | 0.9         | 0.41–2.01        | 0.8          |
| 13                          | 53         | 14911         | 1.81        | 1.01–3.23        | 0.05         |
| 14                          | 29         | 11142         | 4.04        | 1.53–10.68       | 0.005        |
| 15                          | 23         | 10303         | 2.16        | 0.88–5.29        | 0.09         |
| 16                          | 23         | 11252         | 3.34        | 1.23–9.05        | 0.02         |
| 17                          | 20         | 8005          | 0.23        | 0.07–0.78        | 0.02         |
| 18                          | 20         | 7151          | 0.73        | 0.26–2.03        | 0.5          |
| <b>random effects model</b> | <b>604</b> | <b>211249</b> | <b>1.26</b> | <b>0.95–1.67</b> | <b>0.1</b>   |
| <b>fixed effects model</b>  | <b>604</b> | <b>211249</b> | <b>1.31</b> | <b>1.1–1.55</b>  | <b>0.002</b> |

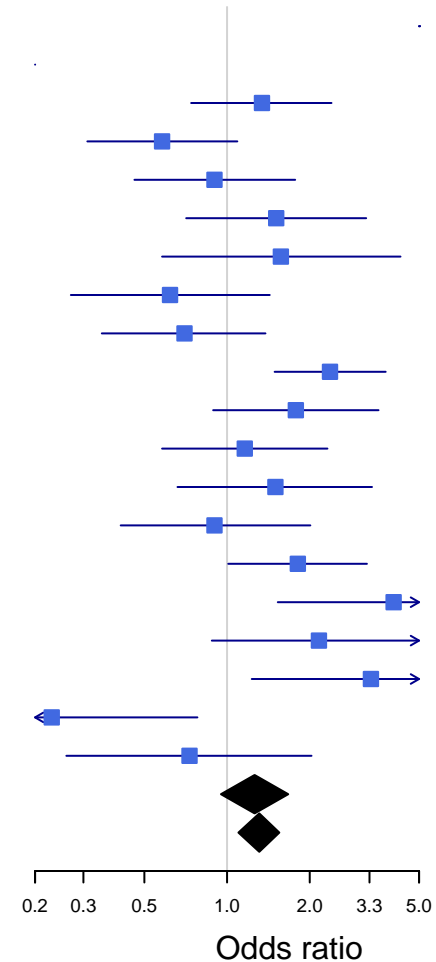

# Propensity for Vbeta6.2

| donor                       | V6.2        | total TCRs    | OR          | CI               | p value      |
|-----------------------------|-------------|---------------|-------------|------------------|--------------|
| 1                           | 574         | 13593         | 1.19        | 1–1.4            | 0.05         |
| 2                           | 365         | 12567         | 1.98        | 1.58–2.47        | 2e–09        |
| 3                           | 1018        | 14965         | 1.35        | 1.17–1.55        | 4e–05        |
| 4                           | 290         | 12387         | 0.92        | 0.72–1.16        | 0.5          |
| 5                           | 297         | 8050          | 1.5         | 1.18–1.91        | 9e–04        |
| 6                           | 476         | 12302         | 1.59        | 1.32–1.93        | 2e–06        |
| 7                           | 332         | 9929          | 1.68        | 1.34–2.11        | 7e–06        |
| 8                           | 671         | 12477         | 1.3         | 1.11–1.53        | 0.001        |
| 9                           | 325         | 13909         | 1.32        | 1.06–1.65        | 0.01         |
| 10                          | 564         | 13074         | 1.39        | 1.16–1.65        | 2e–04        |
| 11                          | 384         | 12150         | 1.37        | 1.1–1.69         | 0.004        |
| 12                          | 506         | 13082         | 0.91        | 0.76–1.09        | 0.3          |
| 13                          | 305         | 14911         | 1.55        | 1.22–1.97        | 3e–04        |
| 14                          | 492         | 11142         | 0.79        | 0.65–0.94        | 0.01         |
| 15                          | 262         | 10303         | 1.06        | 0.83–1.36        | 0.6          |
| 16                          | 414         | 11252         | 1.67        | 1.35–2.05        | 1e–06        |
| 17                          | 456         | 8005          | 2.88        | 2.35–3.53        | 2e–24        |
| 18                          | 337         | 7151          | 1.35        | 1–1.82           | 0.05         |
| <b>random effects model</b> | <b>8068</b> | <b>211249</b> | <b>1.37</b> | <b>1.19–1.57</b> | <b>9e–06</b> |
| <b>fixed effects model</b>  | <b>8068</b> | <b>211249</b> | <b>1.35</b> | <b>1.29–1.41</b> | <b>5e–36</b> |

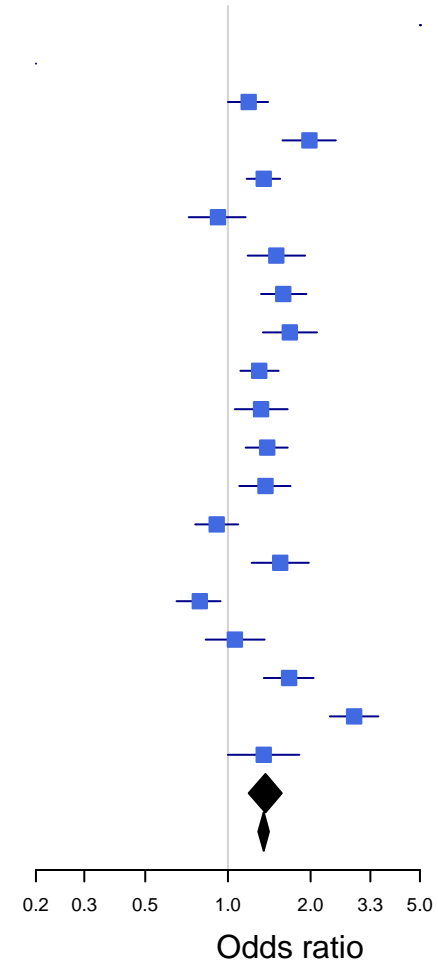

# Propensity for Vbeta7.3

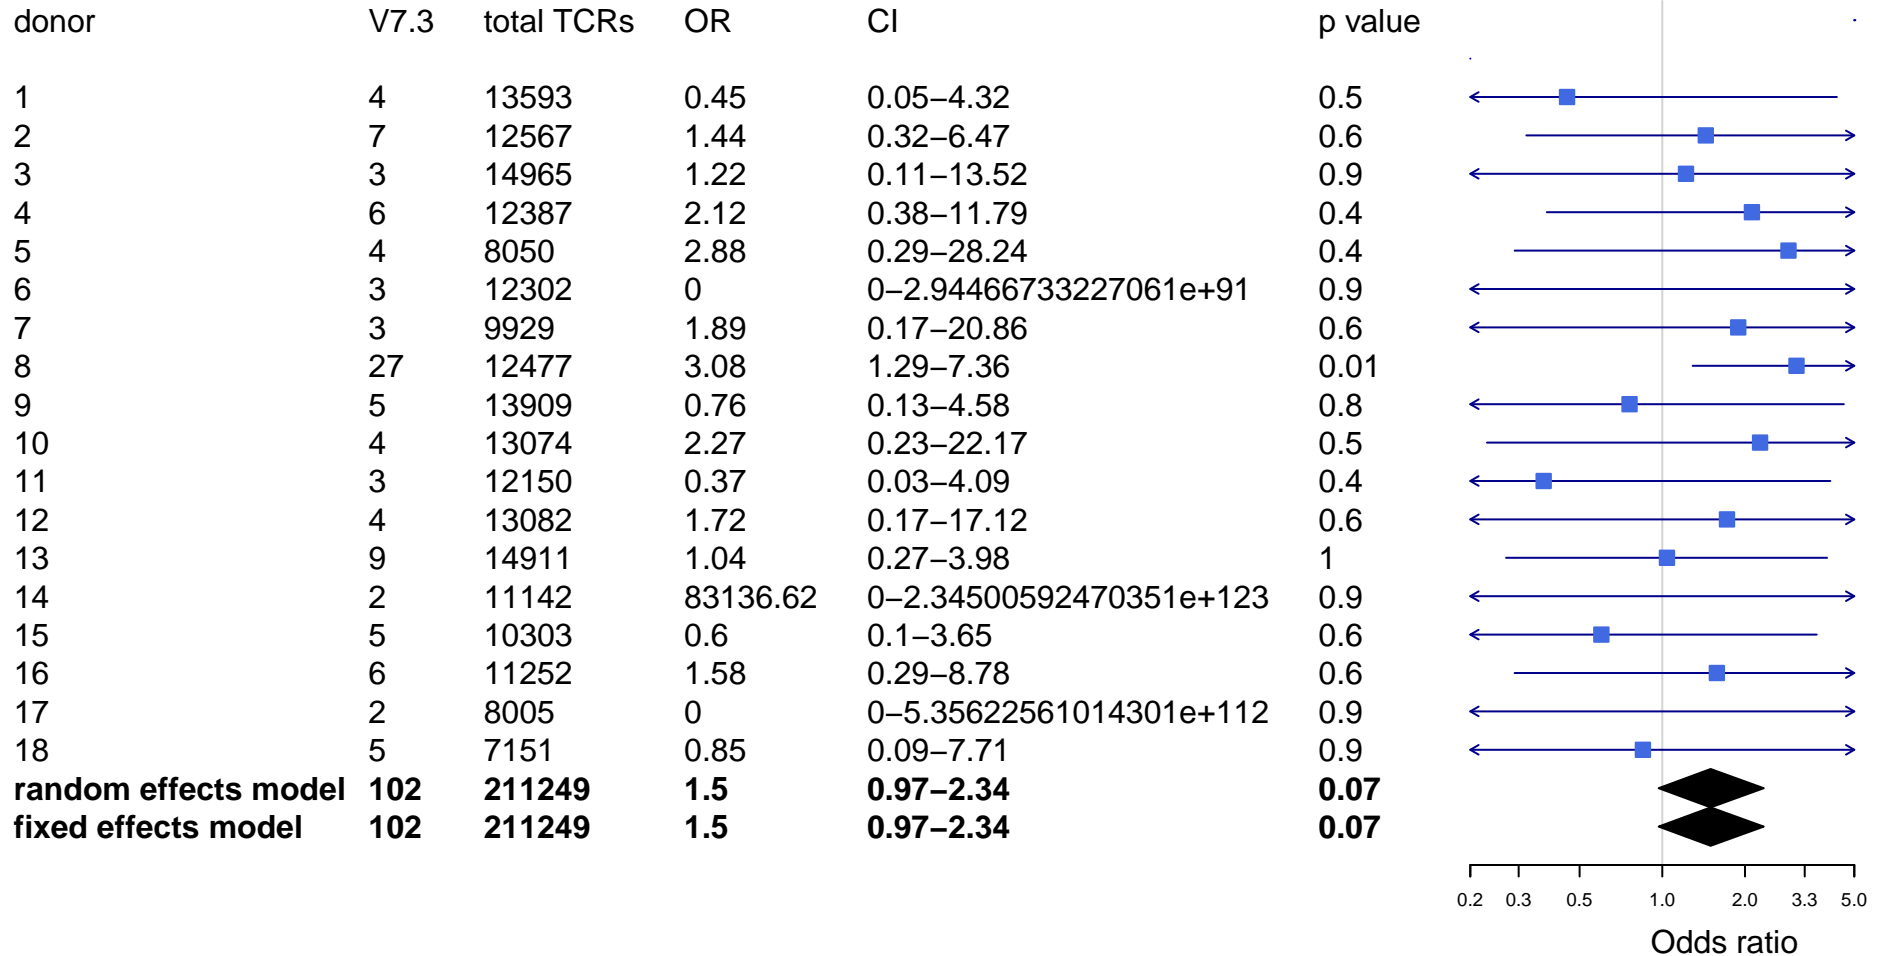



# Propensity for Vbeta6.6

| donor                       | V6.6        | total TCRs    | OR          | CI               | p value      |
|-----------------------------|-------------|---------------|-------------|------------------|--------------|
| 1                           | 639         | 13593         | 1.37        | 1.17–1.61        | 1e–04        |
| 2                           | 555         | 12567         | 1.36        | 1.14–1.61        | 6e–04        |
| 3                           | 735         | 14965         | 1.17        | 1–1.38           | 0.06         |
| 4                           | 528         | 12387         | 1.55        | 1.29–1.85        | 2e–06        |
| 5                           | 447         | 8050          | 1.34        | 1.1–1.63         | 0.004        |
| 6                           | 646         | 12302         | 1.47        | 1.25–1.74        | 4e–06        |
| 7                           | 484         | 9929          | 1.13        | 0.94–1.35        | 0.2          |
| 8                           | 557         | 12477         | 1.19        | 1–1.42           | 0.05         |
| 9                           | 630         | 13909         | 1.49        | 1.26–1.75        | 2e–06        |
| 10                          | 558         | 13074         | 1.82        | 1.51–2.18        | 1e–10        |
| 11                          | 464         | 12150         | 1.17        | 0.97–1.42        | 0.1          |
| 12                          | 554         | 13082         | 1.37        | 1.14–1.64        | 7e–04        |
| 13                          | 927         | 14911         | 1.28        | 1.11–1.46        | 5e–04        |
| 14                          | 406         | 11142         | 1.66        | 1.34–2.05        | 3e–06        |
| 15                          | 520         | 10303         | 1.58        | 1.31–1.9         | 1e–06        |
| 16                          | 436         | 11252         | 1.87        | 1.52–2.3         | 2e–09        |
| 17                          | 253         | 8005          | 1.58        | 1.23–2.04        | 4e–04        |
| 18                          | 295         | 7151          | 1.06        | 0.79–1.43        | 0.7          |
| <b>random effects model</b> | <b>9634</b> | <b>211249</b> | <b>1.4</b>  | <b>1.3–1.5</b>   | <b>1e–20</b> |
| <b>fixed effects model</b>  | <b>9634</b> | <b>211249</b> | <b>1.39</b> | <b>1.33–1.45</b> | <b>2e–51</b> |

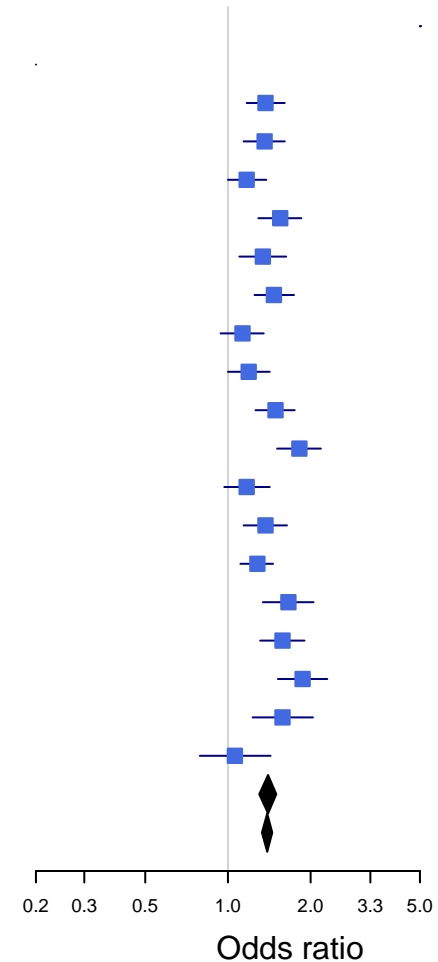

# Propensity for Vbeta5.4

| donor                       | V5.4        | total TCRs    | OR          | CI               | p value      |
|-----------------------------|-------------|---------------|-------------|------------------|--------------|
| 1                           | 35          | 13593         | 1.16        | 0.59–2.26        | 0.7          |
| 2                           | 27          | 12567         | 0.86        | 0.4–1.84         | 0.7          |
| 3                           | 70          | 14965         | 3.6         | 1.78–7.27        | 4e-04        |
| 4                           | 47          | 12387         | 1.1         | 0.62–1.98        | 0.7          |
| 5                           | 25          | 8050          | 2.78        | 1.1–7            | 0.03         |
| 6                           | 47          | 12302         | 0.73        | 0.41–1.3         | 0.3          |
| 7                           | 144         | 9929          | 0.93        | 0.67–1.3         | 0.7          |
| 8                           | 43          | 12477         | 1.24        | 0.68–2.28        | 0.5          |
| 9                           | 58          | 13909         | 1.02        | 0.61–1.72        | 0.9          |
| 10                          | 159         | 13074         | 1.38        | 0.99–1.91        | 0.05         |
| 11                          | 80          | 12150         | 1.54        | 0.96–2.45        | 0.07         |
| 12                          | 103         | 13082         | 3.01        | 1.85–4.88        | 8e-06        |
| 13                          | 232         | 14911         | 1.56        | 1.19–2.06        | 0.001        |
| 14                          | 66          | 11142         | 1.9         | 1.12–3.23        | 0.02         |
| 15                          | 82          | 10303         | 1.5         | 0.95–2.35        | 0.08         |
| 16                          | 125         | 11252         | 2.36        | 1.58–3.53        | 3e-05        |
| 17                          | 74          | 8005          | 0.46        | 0.28–0.77        | 0.003        |
| 18                          | 80          | 7151          | 1.12        | 0.64–1.98        | 0.7          |
| <b>random effects model</b> | <b>1497</b> | <b>211249</b> | <b>1.37</b> | <b>1.1–1.7</b>   | <b>0.005</b> |
| <b>fixed effects model</b>  | <b>1497</b> | <b>211249</b> | <b>1.37</b> | <b>1.23–1.53</b> | <b>2e-08</b> |

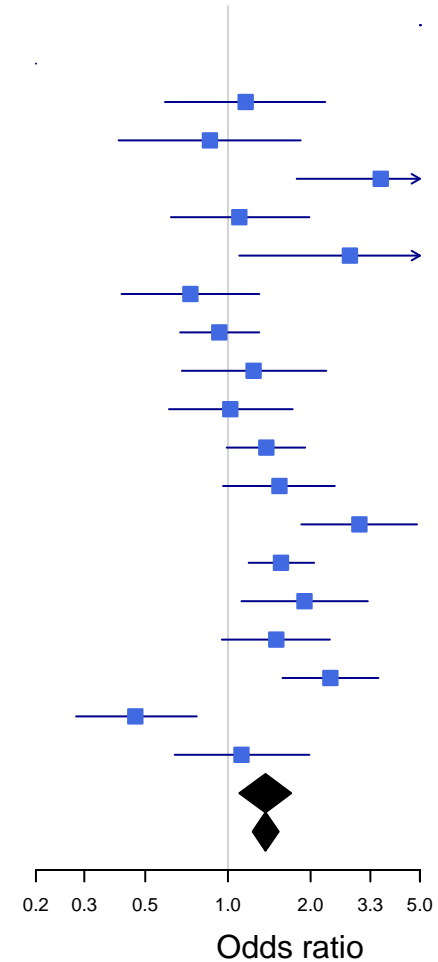

# Propensity for Vbeta10.3

| donor                       | V10.3       | total TCRs    | OR          | CI               | p value      |
|-----------------------------|-------------|---------------|-------------|------------------|--------------|
| 1                           | 215         | 13593         | 0.98        | 0.74–1.28        | 0.9          |
| 2                           | 236         | 12567         | 1.67        | 1.27–2.18        | 2e-04        |
| 3                           | 315         | 14965         | 1.35        | 1.05–1.73        | 0.02         |
| 4                           | 206         | 12387         | 1.86        | 1.39–2.48        | 3e-05        |
| 5                           | 126         | 8050          | 0.95        | 0.67–1.36        | 0.8          |
| 6                           | 307         | 12302         | 1.25        | 1–1.58           | 0.06         |
| 7                           | 216         | 9929          | 1.07        | 0.82–1.41        | 0.6          |
| 8                           | 395         | 12477         | 2.01        | 1.62–2.49        | 2e-10        |
| 9                           | 351         | 13909         | 1.1         | 0.89–1.36        | 0.4          |
| 10                          | 256         | 13074         | 2.21        | 1.68–2.91        | 2e-08        |
| 11                          | 288         | 12150         | 1.13        | 0.89–1.43        | 0.3          |
| 12                          | 313         | 13082         | 2.41        | 1.85–3.15        | 7e-11        |
| 13                          | 391         | 14911         | 1.7         | 1.37–2.11        | 1e-06        |
| 14                          | 293         | 11142         | 2.56        | 1.95–3.35        | 1e-11        |
| 15                          | 208         | 10303         | 1.63        | 1.22–2.18        | 9e-04        |
| 16                          | 324         | 11252         | 2.13        | 1.67–2.72        | 1e-09        |
| 17                          | 113         | 8005          | 0.51        | 0.34–0.77        | 0.001        |
| 18                          | 141         | 7151          | 1.1         | 0.71–1.69        | 0.7          |
| <b>random effects model</b> | <b>4694</b> | <b>211249</b> | <b>1.45</b> | <b>1.22–1.71</b> | <b>2e-05</b> |
| <b>fixed effects model</b>  | <b>4694</b> | <b>211249</b> | <b>1.5</b>  | <b>1.41–1.6</b>  | <b>1e-37</b> |

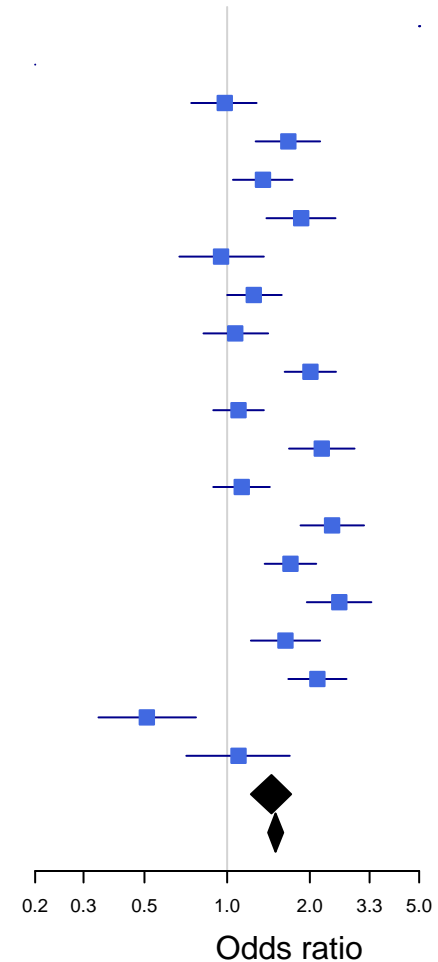

# Propensity for Vbeta12.3

| donor                       | V12.3       | total TCRs    | OR          | CI               | p value      |
|-----------------------------|-------------|---------------|-------------|------------------|--------------|
| 1                           | 486         | 13593         | 1.87        | 1.55–2.25        | 5e-11        |
| 2                           | 451         | 12567         | 1.43        | 1.18–1.73        | 3e-04        |
| 3                           | 907         | 14965         | 1.82        | 1.55–2.13        | 3e-13        |
| 4                           | 566         | 12387         | 2.36        | 1.96–2.84        | 6e-20        |
| 5                           | 411         | 8050          | 1.54        | 1.25–1.9         | 4e-05        |
| 6                           | 496         | 12302         | 2.31        | 1.89–2.82        | 2e-16        |
| 7                           | 468         | 9929          | 0.87        | 0.72–1.05        | 0.2          |
| 8                           | 565         | 12477         | 1.85        | 1.55–2.22        | 2e-11        |
| 9                           | 598         | 13909         | 1.76        | 1.48–2.08        | 6e-11        |
| 10                          | 429         | 13074         | 2.19        | 1.76–2.72        | 1e-12        |
| 11                          | 212         | 12150         | 1.47        | 1.1–1.97         | 0.008        |
| 12                          | 280         | 13082         | 1.51        | 1.17–1.96        | 0.002        |
| 13                          | 672         | 14911         | 1.49        | 1.27–1.75        | 2e-06        |
| 14                          | 232         | 11142         | 7.61        | 4.93–11.75       | 5e-20        |
| 15                          | 456         | 10303         | 1.8         | 1.47–2.2         | 1e-08        |
| 16                          | 494         | 11252         | 0.55        | 0.46–0.66        | 3e-10        |
| 17                          | 140         | 8005          | 0.51        | 0.35–0.73        | 3e-04        |
| 18                          | 248         | 7151          | 0.68        | 0.51–0.92        | 0.01         |
| <b>random effects model</b> | <b>8111</b> | <b>211249</b> | <b>1.53</b> | <b>1.23–1.89</b> | <b>1e-04</b> |
| <b>fixed effects model</b>  | <b>8111</b> | <b>211249</b> | <b>1.53</b> | <b>1.46–1.61</b> | <b>3e-67</b> |

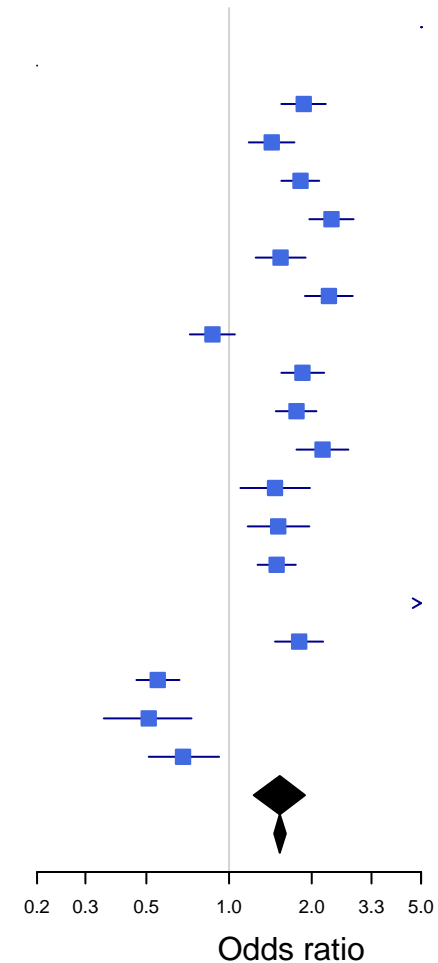

# Propensity for Vbeta20.1

| donor                       | V20.1       | total TCRs    | OR          | CI               | p value           |
|-----------------------------|-------------|---------------|-------------|------------------|-------------------|
| 1                           | 509         | 13593         | 1.4         | 1.17–1.67        | 2e-04             |
| 2                           | 686         | 12567         | 2.47        | 2.08–2.93        | 2e-25             |
| 3                           | 750         | 14965         | 2.15        | 1.79–2.59        | 3e-16             |
| 4                           | 687         | 12387         | 3.01        | 2.53–3.59        | 2e-35             |
| 5                           | 366         | 8050          | 3.18        | 2.48–4.08        | 7e-20             |
| 6                           | 411         | 12302         | 3.79        | 2.96–4.85        | 4e-26             |
| 7                           | 489         | 9929          | 2.37        | 1.95–2.89        | 8e-18             |
| 8                           | 578         | 12477         | 1.98        | 1.66–2.37        | 5e-14             |
| 9                           | 611         | 13909         | 2.61        | 2.19–3.12        | 3e-26             |
| 10                          | 630         | 13074         | 2.67        | 2.22–3.22        | 2e-25             |
| 11                          | 390         | 12150         | 2.31        | 1.83–2.91        | 2e-12             |
| 12                          | 397         | 13082         | 2.67        | 2.09–3.4         | 2e-15             |
| 13                          | 573         | 14911         | 2.26        | 1.87–2.72        | 3e-17             |
| 14                          | 246         | 11142         | 12.78       | 7.56–21.61       | 2e-21             |
| 15                          | 332         | 10303         | 1.95        | 1.54–2.47        | 3e-08             |
| 16                          | 604         | 11252         | 4.36        | 3.52–5.4         | 3e-41             |
| 17                          | 162         | 8005          | 0.07        | 0.03–0.13        | 9e-14             |
| 18                          | 215         | 7151          | 0.54        | 0.4–0.73         | 4e-05             |
| <b>random effects model</b> | <b>8636</b> | <b>211249</b> | <b>2.17</b> | <b>1.73–2.72</b> | <b>2e-11</b>      |
| <b>fixed effects model</b>  | <b>8636</b> | <b>211249</b> | <b>2.34</b> | <b>2.23–2.46</b> | <b>&lt;1e-100</b> |

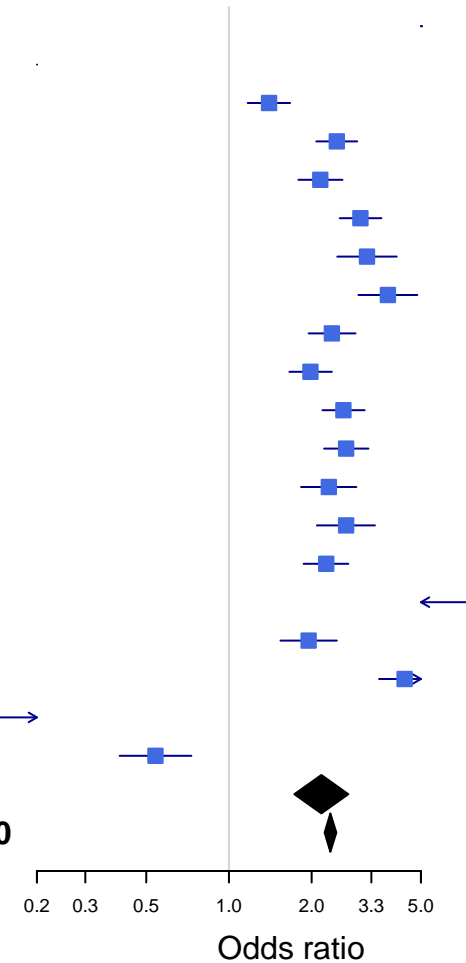

# Propensity for Vbeta7.2

| donor                       | V7.2        | total TCRs    | OR          | CI               | p value      |
|-----------------------------|-------------|---------------|-------------|------------------|--------------|
| 1                           | 118         | 13593         | 1.9         | 1.31–2.76        | 7e-04        |
| 2                           | 83          | 12567         | 2.11        | 1.32–3.39        | 0.002        |
| 3                           | 267         | 14965         | 2.79        | 2.01–3.89        | 1e-09        |
| 4                           | 83          | 12387         | 2.51        | 1.55–4.05        | 2e-04        |
| 5                           | 127         | 8050          | 4.62        | 2.9–7.36         | 1e-10        |
| 6                           | 126         | 12302         | 1.99        | 1.36–2.91        | 4e-04        |
| 7                           | 155         | 9929          | 2.89        | 2.02–4.14        | 7e-09        |
| 8                           | 166         | 12477         | 4.85        | 3.22–7.32        | 5e-14        |
| 9                           | 91          | 13909         | 1.76        | 1.15–2.69        | 0.009        |
| 10                          | 143         | 13074         | 4.34        | 2.79–6.76        | 8e-11        |
| 11                          | 73          | 12150         | 3.7         | 2.02–6.76        | 2e-05        |
| 12                          | 41          | 13082         | 1.92        | 0.95–3.85        | 0.07         |
| 13                          | 66          | 14911         | 1.8         | 1.07–3.04        | 0.03         |
| 14                          | 81          | 11142         | 21.5        | 6.77–68.29       | 2e-07        |
| 15                          | 40          | 10303         | 1.91        | 0.96–3.78        | 0.06         |
| 16                          | 92          | 11252         | 3.46        | 2.08–5.75        | 2e-06        |
| 17                          | 70          | 8005          | 0.13        | 0.06–0.28        | 3e-07        |
| 18                          | 70          | 7151          | 1.14        | 0.61–2.13        | 0.7          |
| <b>random effects model</b> | <b>1892</b> | <b>211249</b> | <b>2.38</b> | <b>1.78–3.19</b> | <b>7e-09</b> |
| <b>fixed effects model</b>  | <b>1892</b> | <b>211249</b> | <b>2.51</b> | <b>2.24–2.81</b> | <b>1e-58</b> |

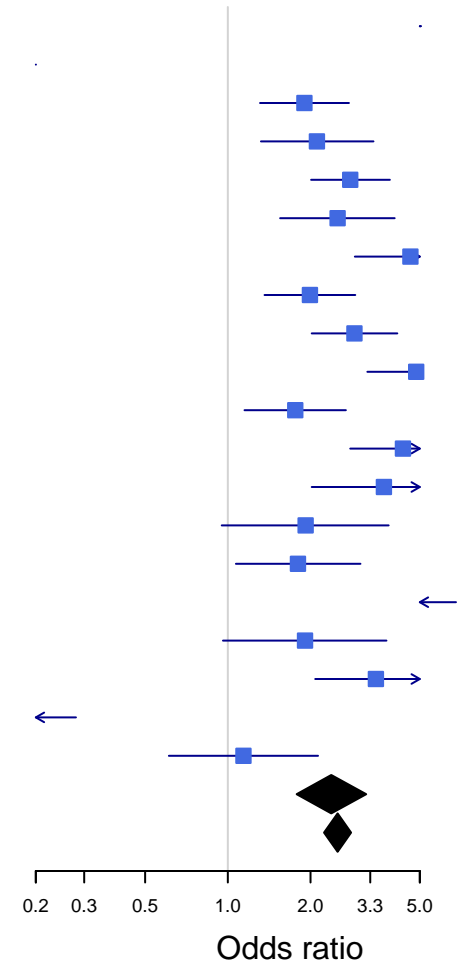

# Propensity for Vbeta5.1

| donor                       | V5.1        | total TCRs    | OR          | CI               | p value           |
|-----------------------------|-------------|---------------|-------------|------------------|-------------------|
| 1                           | 636         | 13593         | 1.97        | 1.67–2.32        | 6e-16             |
| 2                           | 499         | 12567         | 2.44        | 2–2.97           | 1e-18             |
| 3                           | 607         | 14965         | 2.75        | 2.22–3.42        | 3e-20             |
| 4                           | 538         | 12387         | 1.5         | 1.25–1.79        | 8e-06             |
| 5                           | 439         | 8050          | 4.03        | 3.16–5.13        | 2e-29             |
| 6                           | 688         | 12302         | 5.41        | 4.38–6.69        | 5e-55             |
| 7                           | 527         | 9929          | 2.57        | 2.12–3.11        | 9e-22             |
| 8                           | 295         | 12477         | 2.61        | 2.01–3.38        | 4e-13             |
| 9                           | 552         | 13909         | 2.14        | 1.79–2.56        | 1e-16             |
| 10                          | 450         | 13074         | 2.14        | 1.74–2.63        | 7e-13             |
| 11                          | 494         | 12150         | 2.08        | 1.7–2.54         | 1e-12             |
| 12                          | 300         | 13082         | 4.09        | 2.99–5.61        | 2e-18             |
| 13                          | 671         | 14911         | 4.3         | 3.5–5.28         | 4e-44             |
| 14                          | 448         | 11142         | 13.29       | 9.04–19.54       | 2e-39             |
| 15                          | 546         | 10303         | 2.32        | 1.92–2.81        | 4e-18             |
| 16                          | 602         | 11252         | 3.9         | 3.17–4.79        | 8e-38             |
| 17                          | 224         | 8005          | 0.1         | 0.06–0.17        | 4e-20             |
| 18                          | 352         | 7151          | 1.68        | 1.23–2.3         | 0.001             |
| <b>random effects model</b> | <b>8868</b> | <b>211249</b> | <b>2.49</b> | <b>1.93–3.21</b> | <b>3e-12</b>      |
| <b>fixed effects model</b>  | <b>8868</b> | <b>211249</b> | <b>2.56</b> | <b>2.44–2.7</b>  | <b>&lt;1e-100</b> |

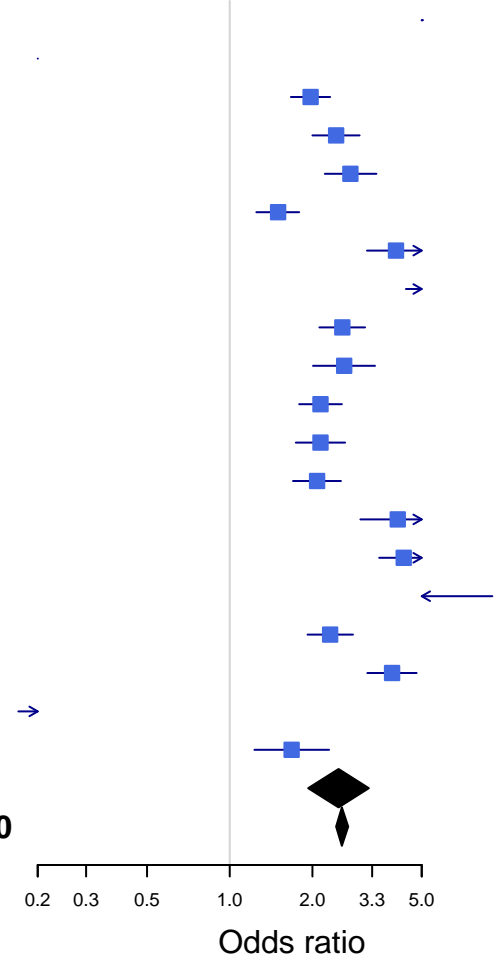

# Propensity for Vbeta18

| donor                       | V18         | total TCRs    | OR          | CI               | p value           |
|-----------------------------|-------------|---------------|-------------|------------------|-------------------|
| 1                           | 239         | 13593         | 6.14        | 4.35–8.69        | 9e–25             |
| 2                           | 237         | 12567         | 5.61        | 3.91–8.06        | 9e–21             |
| 3                           | 380         | 14965         | 5.35        | 3.77–7.6         | 7e–21             |
| 4                           | 214         | 12387         | 3.79        | 2.73–5.28        | 3e–15             |
| 5                           | 165         | 8050          | 5.49        | 3.55–8.51        | 2e–14             |
| 6                           | 432         | 12302         | 6.2         | 4.68–8.22        | 7e–37             |
| 7                           | 213         | 9929          | 4.58        | 3.23–6.5         | 1e–17             |
| 8                           | 208         | 12477         | 6.25        | 4.21–9.3         | 1e–19             |
| 9                           | 276         | 13909         | 5.55        | 4.03–7.64        | 7e–26             |
| 10                          | 110         | 13074         | 1.82        | 1.21–2.74        | 0.004             |
| 11                          | 140         | 12150         | 2.06        | 1.41–3.01        | 2e–04             |
| 12                          | 256         | 13082         | 3.41        | 2.45–4.73        | 3e–13             |
| 13                          | 366         | 14911         | 3.37        | 2.6–4.35         | 2e–20             |
| 14                          | 226         | 11142         | 3.58        | 2.55–5.03        | 2e–13             |
| 15                          | 273         | 10303         | 6.96        | 4.79–10.1        | 2e–24             |
| 16                          | 254         | 11252         | 6.48        | 4.44–9.47        | 4e–22             |
| 17                          | 489         | 8005          | 18.31       | 12.87–26.04      | 9e–59             |
| 18                          | 115         | 7151          | 2.31        | 1.24–4.33        | 0.009             |
| <b>random effects model</b> | <b>4593</b> | <b>211249</b> | <b>4.71</b> | <b>3.73–5.95</b> | <b>1e–38</b>      |
| <b>fixed effects model</b>  | <b>4593</b> | <b>211249</b> | <b>4.78</b> | <b>4.4–5.2</b>   | <b>&lt;1e–100</b> |

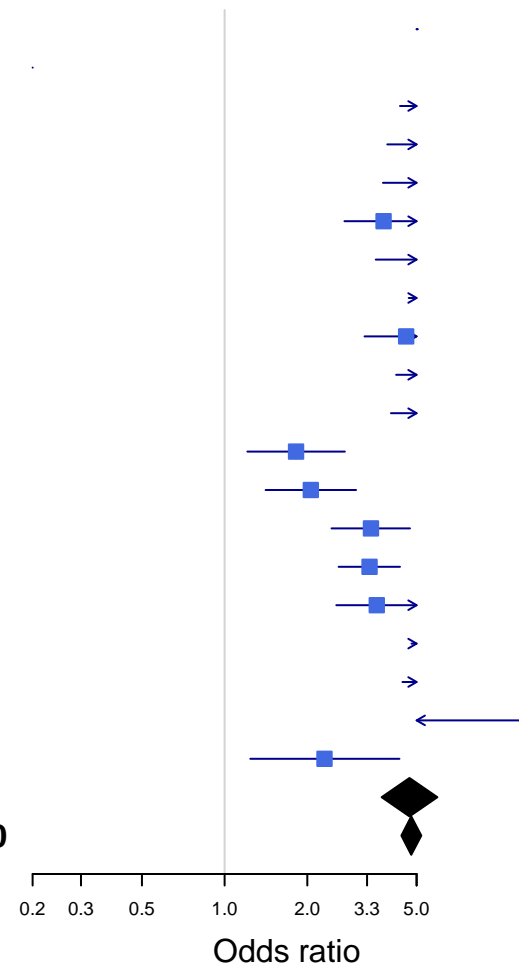

Supplement: pone.0140815.s002.pdf [file pone.0140815.s002.pdf]
