# Supplementary material for: Somatic Variation of T-Cell Receptor Genes Strongly Associate with HLA Class Restriction
Source: PubMed Central journal article supplement (PMC4627806; doi:10.1371/journal.pone.0140815), 2015-10-30

# Propensity for Valpha1.2

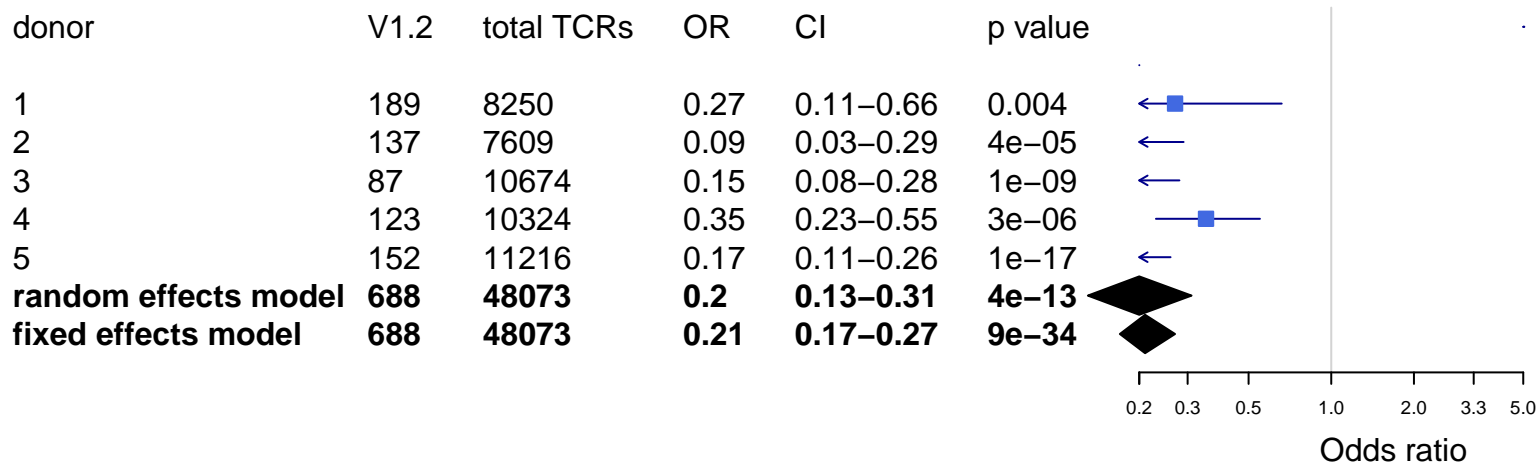

# Propensity for Valpha4

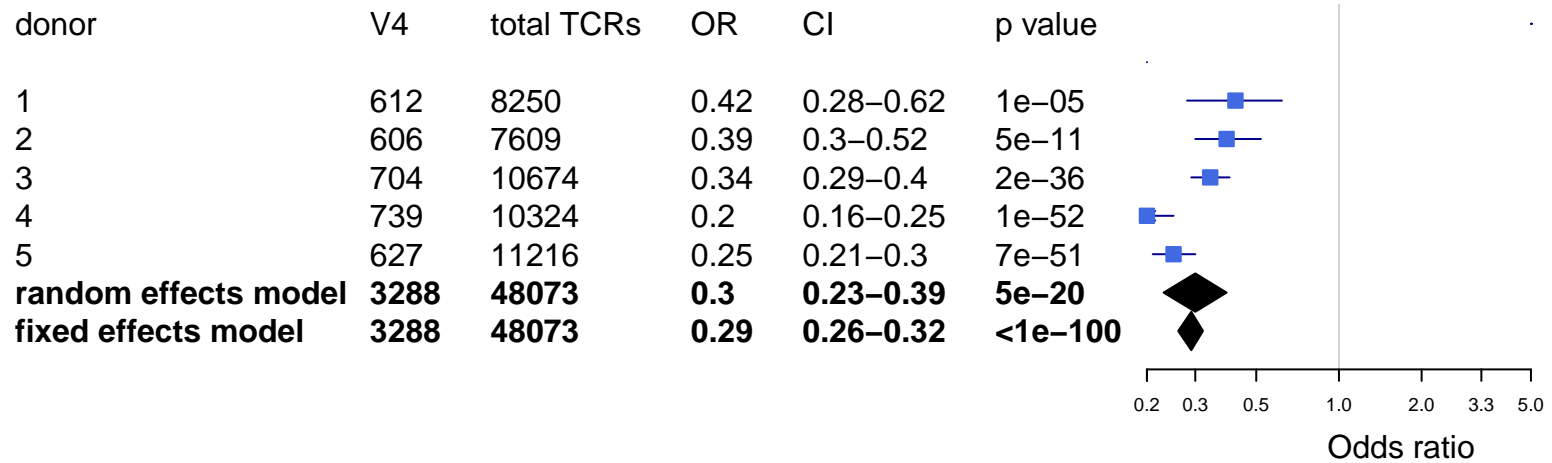

# Propensity for Valpha24

| donor                       | V24        | total TCRs   | OR          | CI               | p value      |
|-----------------------------|------------|--------------|-------------|------------------|--------------|
| 1                           | 67         | 8250         | 1.11        | 0.5–2.47         | 0.8          |
| 2                           | 62         | 7609         | 0.89        | 0.46–1.72        | 0.7          |
| 3                           | 182        | 10674        | 0.43        | 0.32–0.59        | 1e-07        |
| 4                           | 64         | 10324        | 0.35        | 0.19–0.63        | 4e-04        |
| 5                           | 135        | 11216        | 0.28        | 0.19–0.41        | 4e-11        |
| <b>random effects model</b> | <b>510</b> | <b>48073</b> | <b>0.49</b> | <b>0.31–0.76</b> | <b>0.001</b> |
| <b>fixed effects model</b>  | <b>510</b> | <b>48073</b> | <b>0.42</b> | <b>0.34–0.52</b> | <b>9e-17</b> |

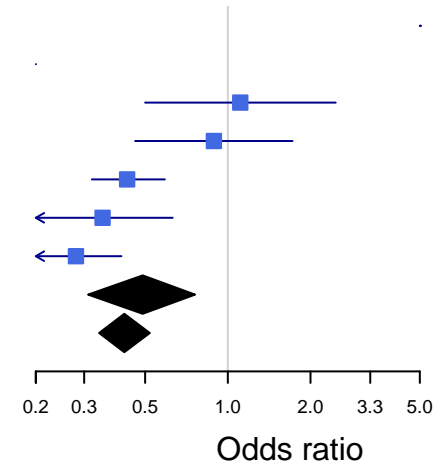

# Propensity for Valpha3

| donor                       | V3         | total TCRs   | OR          | CI               | p value      |
|-----------------------------|------------|--------------|-------------|------------------|--------------|
| 1                           | 73         | 8250         | 0.58        | 0.21–1.6         | 0.3          |
| 2                           | 40         | 7609         | 0.72        | 0.3–1.74         | 0.5          |
| 3                           | 57         | 10674        | 1.01        | 0.59–1.72        | 1            |
| 4                           | 85         | 10324        | 0.28        | 0.16–0.49        | 8e-06        |
| 5                           | 87         | 11216        | 0.33        | 0.21–0.52        | 2e-06        |
| <b>random effects model</b> | <b>342</b> | <b>48073</b> | <b>0.5</b>  | <b>0.29–0.88</b> | <b>0.02</b>  |
| <b>fixed effects model</b>  | <b>342</b> | <b>48073</b> | <b>0.47</b> | <b>0.36–0.62</b> | <b>5e-08</b> |

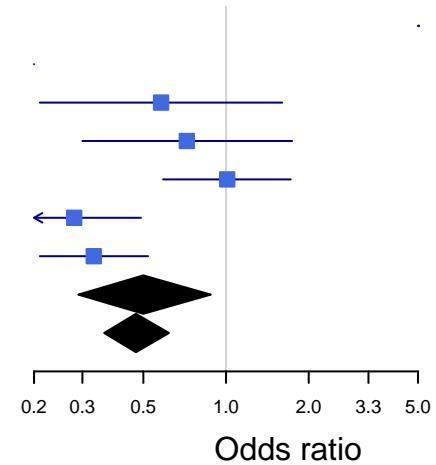

# Propensity for Valpha21

| donor                       | V21         | total TCRs   | OR          | CI               | p value      |
|-----------------------------|-------------|--------------|-------------|------------------|--------------|
| 1                           | 292         | 8250         | 1.04        | 0.7–1.56         | 0.8          |
| 2                           | 282         | 7609         | 0.41        | 0.27–0.61        | 1e–05        |
| 3                           | 467         | 10674        | 0.55        | 0.45–0.66        | 7e–10        |
| 4                           | 292         | 10324        | 0.9         | 0.71–1.14        | 0.4          |
| 5                           | 411         | 11216        | 0.22        | 0.18–0.28        | 4e–38        |
| <b>random effects model</b> | <b>1744</b> | <b>48073</b> | <b>0.54</b> | <b>0.31–0.94</b> | <b>0.03</b>  |
| <b>fixed effects model</b>  | <b>1744</b> | <b>48073</b> | <b>0.5</b>  | <b>0.45–0.56</b> | <b>4e–32</b> |

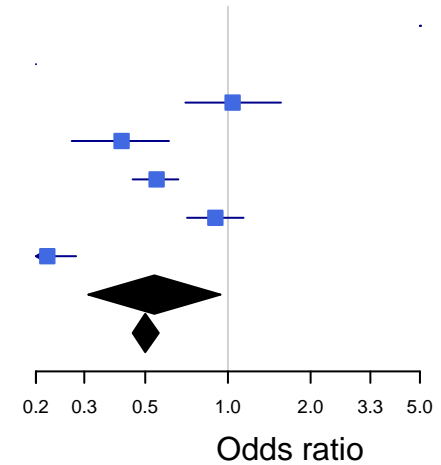

# Propensity for Valpha12.2

| donor                       | V12.2       | total TCRs   | OR          | CI               | p value      |
|-----------------------------|-------------|--------------|-------------|------------------|--------------|
| 1                           | 208         | 8250         | 0.24        | 0.1–0.58         | 0.002        |
| 2                           | 204         | 7609         | 0.43        | 0.26–0.69        | 5e–04        |
| 3                           | 235         | 10674        | 0.56        | 0.43–0.74        | 3e–05        |
| 4                           | 370         | 10324        | 0.52        | 0.41–0.65        | 3e–08        |
| 5                           | 287         | 11216        | 0.46        | 0.36–0.58        | 3e–10        |
| <b>random effects model</b> | <b>1304</b> | <b>48073</b> | <b>0.49</b> | <b>0.42–0.57</b> | <b>2e–21</b> |
| <b>fixed effects model</b>  | <b>1304</b> | <b>48073</b> | <b>0.49</b> | <b>0.43–0.56</b> | <b>8e–25</b> |

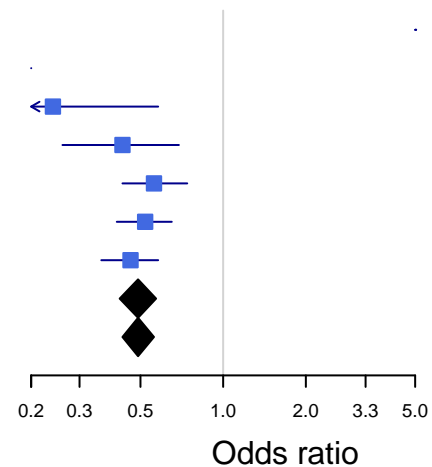

# Propensity for Valpha38.1

| donor                       | V38.1       | total TCRs   | OR          | CI               | p value      |
|-----------------------------|-------------|--------------|-------------|------------------|--------------|
| 1                           | 266         | 8250         | 0.73        | 0.45–1.18        | 0.2          |
| 2                           | 115         | 7609         | 0.76        | 0.46–1.25        | 0.3          |
| 3                           | 381         | 10674        | 0.66        | 0.54–0.82        | 1e-04        |
| 4                           | 600         | 10324        | 0.51        | 0.43–0.61        | 9e-13        |
| 5                           | 394         | 11216        | 0.38        | 0.31–0.47        | 6e-19        |
| <b>random effects model</b> | <b>1756</b> | <b>48073</b> | <b>0.56</b> | <b>0.44–0.72</b> | <b>8e-06</b> |
| <b>fixed effects model</b>  | <b>1756</b> | <b>48073</b> | <b>0.53</b> | <b>0.47–0.59</b> | <b>3e-30</b> |

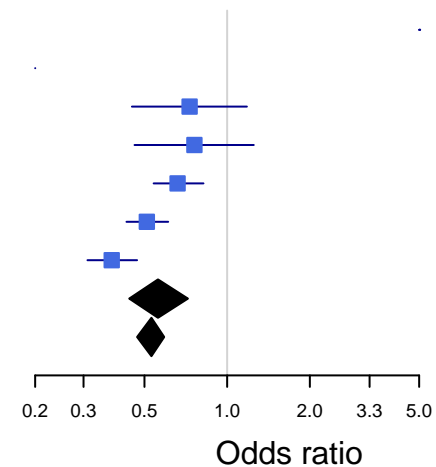

# Propensity for Valpha30

| donor                       | V30         | total TCRs   | OR          | CI               | p value      |
|-----------------------------|-------------|--------------|-------------|------------------|--------------|
| 1                           | 179         | 8250         | 0.99        | 0.59–1.67        | 1            |
| 2                           | 227         | 7609         | 0.58        | 0.39–0.85        | 0.005        |
| 3                           | 286         | 10674        | 0.45        | 0.35–0.57        | 2e–10        |
| 4                           | 192         | 10324        | 0.59        | 0.43–0.8         | 8e–04        |
| 5                           | 173         | 11216        | 0.6         | 0.44–0.82        | 0.001        |
| <b>random effects model</b> | <b>1057</b> | <b>48073</b> | <b>0.58</b> | <b>0.47–0.72</b> | <b>9e–07</b> |
| <b>fixed effects model</b>  | <b>1057</b> | <b>48073</b> | <b>0.56</b> | <b>0.48–0.65</b> | <b>4e–15</b> |

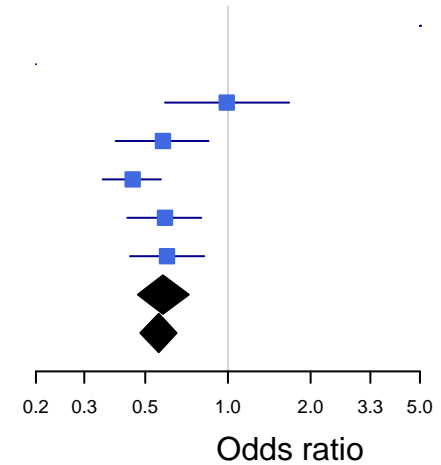



# Propensity for Valpha8.1

| donor                       | V8.1       | total TCRs   | OR          | CI               | p value      |
|-----------------------------|------------|--------------|-------------|------------------|--------------|
| 1                           | 92         | 8250         | 0.67        | 0.29–1.54        | 0.3          |
| 2                           | 84         | 7609         | 0.89        | 0.51–1.55        | 0.7          |
| 3                           | 108        | 10674        | 1.03        | 0.7–1.51         | 0.9          |
| 4                           | 202        | 10324        | 1.02        | 0.77–1.36        | 0.9          |
| 5                           | 325        | 11216        | 0.35        | 0.27–0.44        | 2e-18        |
| <b>random effects model</b> | <b>811</b> | <b>48073</b> | <b>0.73</b> | <b>0.42–1.28</b> | <b>0.3</b>   |
| <b>fixed effects model</b>  | <b>811</b> | <b>48073</b> | <b>0.63</b> | <b>0.54–0.73</b> | <b>3e-09</b> |

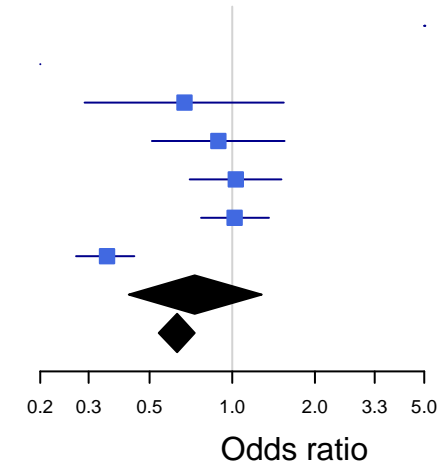

# Propensity for Valpha8.2

| donor                       | V8.2       | total TCRs   | OR          | CI              | p value      |
|-----------------------------|------------|--------------|-------------|-----------------|--------------|
| 1                           | 59         | 8250         | 1.93        | 0.97–3.87       | 0.06         |
| 2                           | 77         | 7609         | 0.88        | 0.49–1.6        | 0.7          |
| 3                           | 83         | 10674        | 0.55        | 0.35–0.86       | 0.009        |
| 4                           | 95         | 10324        | 0.78        | 0.51–1.19       | 0.3          |
| 5                           | 169        | 11216        | 0.48        | 0.35–0.65       | 4e-06        |
| <b>random effects model</b> | <b>483</b> | <b>48073</b> | <b>0.76</b> | <b>0.5–1.15</b> | <b>0.2</b>   |
| <b>fixed effects model</b>  | <b>483</b> | <b>48073</b> | <b>0.66</b> | <b>0.54–0.8</b> | <b>3e-05</b> |

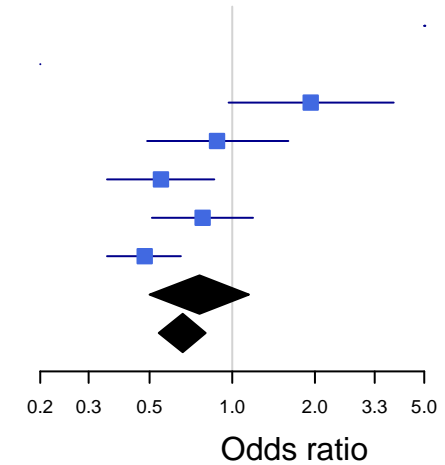

# Propensity for Valpha12.1

| donor                       | V12.1       | total TCRs   | OR          | CI               | p value      |
|-----------------------------|-------------|--------------|-------------|------------------|--------------|
| 1                           | 364         | 8250         | 0.47        | 0.29–0.77        | 0.002        |
| 2                           | 450         | 7609         | 0.4         | 0.29–0.55        | 4e-08        |
| 3                           | 366         | 10674        | 0.64        | 0.52–0.79        | 4e-05        |
| 4                           | 361         | 10324        | 0.83        | 0.66–1.03        | 0.09         |
| 5                           | 808         | 11216        | 0.72        | 0.62–0.83        | 1e-05        |
| <b>random effects model</b> | <b>2349</b> | <b>48073</b> | <b>0.62</b> | <b>0.5–0.77</b>  | <b>2e-05</b> |
| <b>fixed effects model</b>  | <b>2349</b> | <b>48073</b> | <b>0.67</b> | <b>0.61–0.74</b> | <b>3e-15</b> |

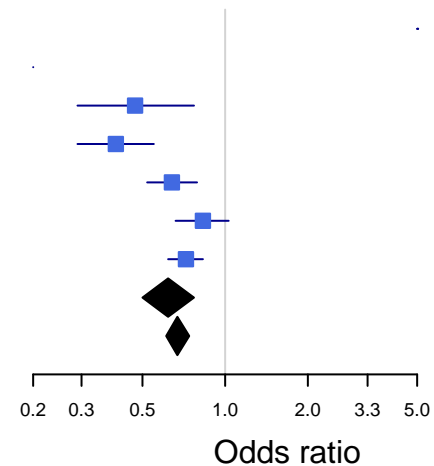

# Propensity for Valpha8

| donor                       | V8          | total TCRs   | OR          | CI               | p value      |
|-----------------------------|-------------|--------------|-------------|------------------|--------------|
| 1                           | 315         | 8250         | 0.87        | 0.57–1.34        | 0.5          |
| 2                           | 191         | 7609         | 1.23        | 0.86–1.74        | 0.3          |
| 3                           | 562         | 10674        | 0.89        | 0.74–1.06        | 0.2          |
| 4                           | 700         | 10324        | 0.56        | 0.47–0.66        | 2e-11        |
| 5                           | 526         | 11216        | 0.61        | 0.51–0.73        | 1e-07        |
| <b>random effects model</b> | <b>2294</b> | <b>48073</b> | <b>0.78</b> | <b>0.6–1.01</b>  | <b>0.06</b>  |
| <b>fixed effects model</b>  | <b>2294</b> | <b>48073</b> | <b>0.71</b> | <b>0.65–0.78</b> | <b>2e-12</b> |

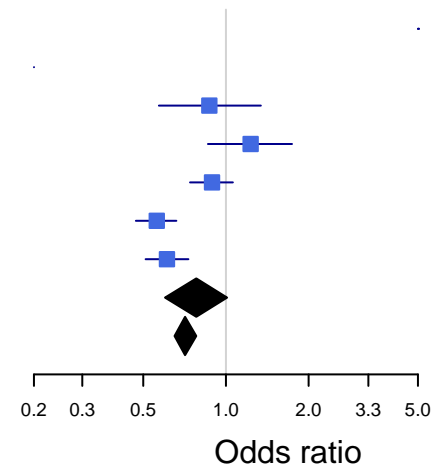

# Propensity for Valpha17

| donor                       | V17         | total TCRs   | OR          | CI               | p value      |
|-----------------------------|-------------|--------------|-------------|------------------|--------------|
| 1                           | 522         | 8250         | 0.45        | 0.29–0.68        | 2e–04        |
| 2                           | 534         | 7609         | 0.91        | 0.73–1.15        | 0.4          |
| 3                           | 574         | 10674        | 0.76        | 0.64–0.91        | 0.002        |
| 4                           | 554         | 10324        | 0.75        | 0.63–0.9         | 0.002        |
| 5                           | 764         | 11216        | 0.63        | 0.54–0.74        | 3e–09        |
| <b>random effects model</b> | <b>2948</b> | <b>48073</b> | <b>0.71</b> | <b>0.61–0.84</b> | <b>4e–05</b> |
| <b>fixed effects model</b>  | <b>2948</b> | <b>48073</b> | <b>0.72</b> | <b>0.66–0.78</b> | <b>5e–14</b> |

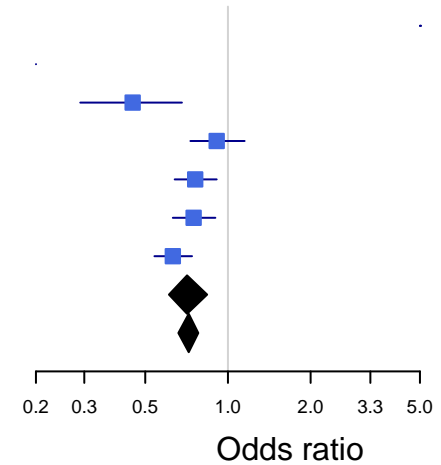

# Propensity for Valpha27

| donor                       | V27         | total TCRs   | OR          | CI               | p value      |
|-----------------------------|-------------|--------------|-------------|------------------|--------------|
| 1                           | 256         | 8250         | 0.85        | 0.54–1.34        | 0.5          |
| 2                           | 210         | 7609         | 0.82        | 0.57–1.18        | 0.3          |
| 3                           | 416         | 10674        | 0.92        | 0.75–1.12        | 0.4          |
| 4                           | 396         | 10324        | 0.99        | 0.8–1.21         | 0.9          |
| 5                           | 460         | 11216        | 0.59        | 0.49–0.71        | 6e-08        |
| <b>random effects model</b> | <b>1738</b> | <b>48073</b> | <b>0.82</b> | <b>0.65–1.02</b> | <b>0.08</b>  |
| <b>fixed effects model</b>  | <b>1738</b> | <b>48073</b> | <b>0.8</b>  | <b>0.72–0.89</b> | <b>6e-05</b> |

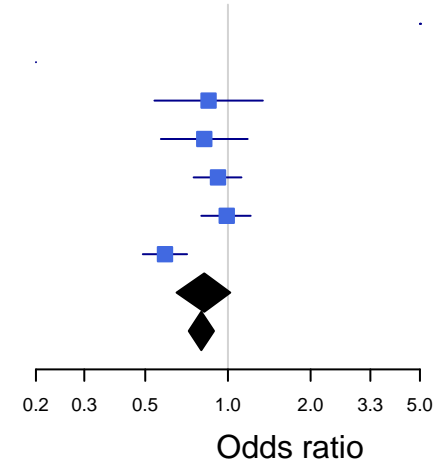

# Propensity for Valpha12.3

| donor                       | V12.3       | total TCRs   | OR          | CI               | p value    |
|-----------------------------|-------------|--------------|-------------|------------------|------------|
| 1                           | 336         | 8250         | 0.64        | 0.41–0.99        | 0.05       |
| 2                           | 266         | 7609         | 0.87        | 0.63–1.19        | 0.4        |
| 3                           | 519         | 10674        | 0.97        | 0.81–1.16        | 0.7        |
| 4                           | 467         | 10324        | 0.95        | 0.78–1.15        | 0.6        |
| 5                           | 443         | 11216        | 1.1         | 0.9–1.35         | 0.3        |
| <b>random effects model</b> | <b>2031</b> | <b>48073</b> | <b>0.95</b> | <b>0.84–1.08</b> | <b>0.4</b> |
| <b>fixed effects model</b>  | <b>2031</b> | <b>48073</b> | <b>0.96</b> | <b>0.87–1.07</b> | <b>0.5</b> |

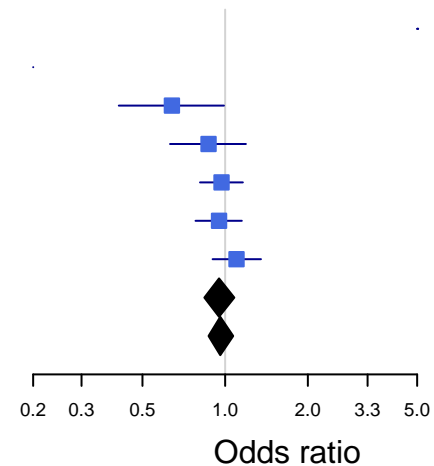

# Propensity for Valpha8.6

| donor                       | V8.6       | total TCRs   | OR          | CI               | p value    |
|-----------------------------|------------|--------------|-------------|------------------|------------|
| 1                           | 110        | 8250         | 1.63        | 0.94–2.8         | 0.08       |
| 2                           | 96         | 7609         | 1.37        | 0.86–2.19        | 0.2        |
| 3                           | 174        | 10674        | 1.36        | 0.99–1.86        | 0.06       |
| 4                           | 179        | 10324        | 1.08        | 0.8–1.46         | 0.6        |
| 5                           | 298        | 11216        | 0.82        | 0.65–1.04        | 0.1        |
| <b>random effects model</b> | <b>857</b> | <b>48073</b> | <b>1.16</b> | <b>0.9–1.49</b>  | <b>0.3</b> |
| <b>fixed effects model</b>  | <b>857</b> | <b>48073</b> | <b>1.08</b> | <b>0.93–1.25</b> | <b>0.3</b> |

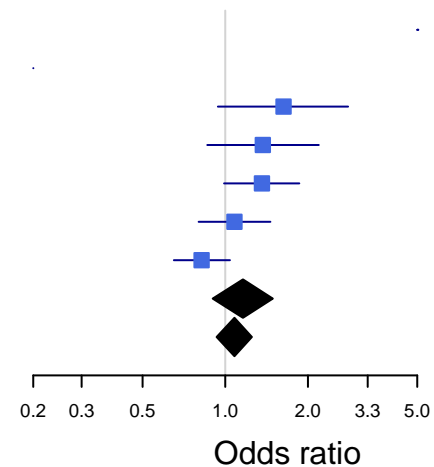



# Propensity for Valpha13.2

| donor                       | V13.2       | total TCRs   | OR          | CI               | p value     |
|-----------------------------|-------------|--------------|-------------|------------------|-------------|
| 1                           | 963         | 8250         | 0.52        | 0.39–0.69        | 1e–05       |
| 2                           | 679         | 7609         | 1.36        | 1.13–1.64        | 0.001       |
| 3                           | 875         | 10674        | 0.87        | 0.75–1           | 0.05        |
| 4                           | 713         | 10324        | 0.85        | 0.72–0.99        | 0.04        |
| 5                           | 591         | 11216        | 3.19        | 2.58–3.95        | 2e–26       |
| <b>random effects model</b> | <b>3821</b> | <b>48073</b> | <b>1.11</b> | <b>0.67–1.84</b> | <b>0.7</b>  |
| <b>fixed effects model</b>  | <b>3821</b> | <b>48073</b> | <b>1.09</b> | <b>1–1.18</b>    | <b>0.04</b> |

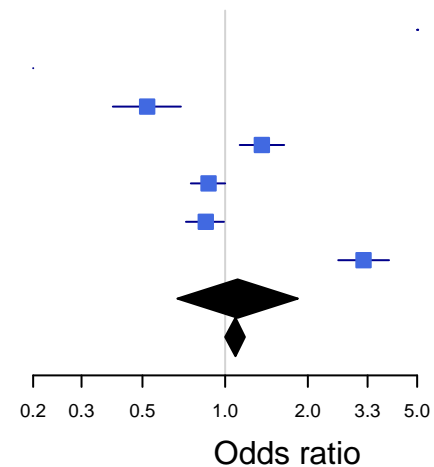

# Propensity for Valpha5

| donor                       | V5          | total TCRs   | OR          | CI               | p value    |
|-----------------------------|-------------|--------------|-------------|------------------|------------|
| 1                           | 291         | 8250         | 1.45        | 1.01–2.08        | 0.05       |
| 2                           | 629         | 7609         | 0.62        | 0.49–0.78        | 5e-05      |
| 3                           | 647         | 10674        | 0.84        | 0.71–0.99        | 0.03       |
| 4                           | 591         | 10324        | 1.02        | 0.86–1.2         | 0.9        |
| 5                           | 398         | 11216        | 5.03        | 3.67–6.89        | 1e-23      |
| <b>random effects model</b> | <b>2556</b> | <b>48073</b> | <b>1.3</b>  | <b>0.74–2.27</b> | <b>0.4</b> |
| <b>fixed effects model</b>  | <b>2556</b> | <b>48073</b> | <b>1.04</b> | <b>0.94–1.14</b> | <b>0.5</b> |

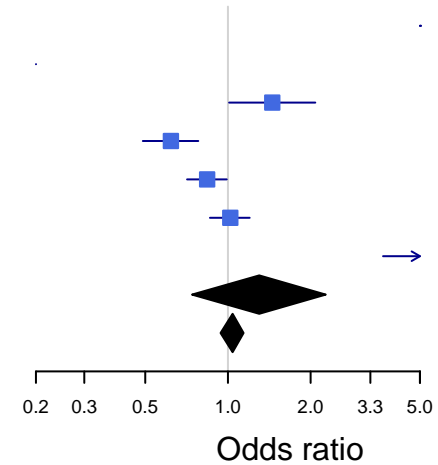

# Propensity for Valpha25

| donor                       | V25        | total TCRs   | OR          | CI              | p value    |
|-----------------------------|------------|--------------|-------------|-----------------|------------|
| 1                           | 127        | 8250         | 1.36        | 0.79–2.32       | 0.3        |
| 2                           | 128        | 7609         | 1.19        | 0.78–1.8        | 0.4        |
| 3                           | 235        | 10674        | 1.13        | 0.86–1.47       | 0.4        |
| 4                           | 151        | 10324        | 1.48        | 1.07–2.05       | 0.02       |
| 5                           | 175        | 11216        | 0.79        | 0.58–1.07       | 0.1        |
| <b>random effects model</b> | <b>816</b> | <b>48073</b> | <b>1.14</b> | <b>0.9–1.43</b> | <b>0.3</b> |
| <b>fixed effects model</b>  | <b>816</b> | <b>48073</b> | <b>1.12</b> | <b>0.96–1.3</b> | <b>0.1</b> |

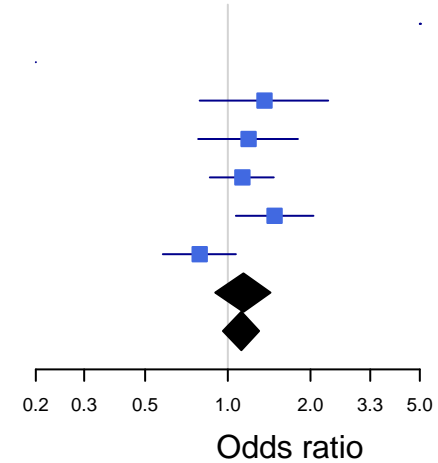

# Propensity for Valpha8.4

| donor                       | V8.4       | total TCRs   | OR          | CI               | p value     |
|-----------------------------|------------|--------------|-------------|------------------|-------------|
| 1                           | 87         | 8250         | 1.87        | 1.02–3.42        | 0.04        |
| 2                           | 129        | 7609         | 1.44        | 0.96–2.16        | 0.08        |
| 3                           | 198        | 10674        | 1.35        | 1.01–1.81        | 0.05        |
| 4                           | 170        | 10324        | 1.17        | 0.86–1.59        | 0.3         |
| 5                           | 262        | 11216        | 0.89        | 0.69–1.14        | 0.4         |
| <b>random effects model</b> | <b>846</b> | <b>48073</b> | <b>1.22</b> | <b>0.97–1.54</b> | <b>0.08</b> |
| <b>fixed effects model</b>  | <b>846</b> | <b>48073</b> | <b>1.17</b> | <b>1.01–1.35</b> | <b>0.04</b> |

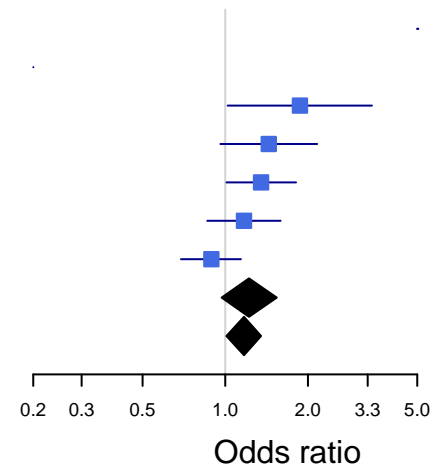

# Propensity for Valpha26.2

| donor                       | V26.2       | total TCRs   | OR          | CI               | p value      |
|-----------------------------|-------------|--------------|-------------|------------------|--------------|
| 1                           | 410         | 8250         | 0.74        | 0.5–1.09         | 0.1          |
| 2                           | 387         | 7609         | 1.45        | 1.15–1.84        | 0.002        |
| 3                           | 281         | 10674        | 1.03        | 0.81–1.32        | 0.8          |
| 4                           | 311         | 10324        | 1.44        | 1.15–1.81        | 0.002        |
| 5                           | 127         | 11216        | 1.28        | 0.87–1.87        | 0.2          |
| <b>random effects model</b> | <b>1516</b> | <b>48073</b> | <b>1.18</b> | <b>0.95–1.48</b> | <b>0.1</b>   |
| <b>fixed effects model</b>  | <b>1516</b> | <b>48073</b> | <b>1.23</b> | <b>1.09–1.39</b> | <b>0.001</b> |

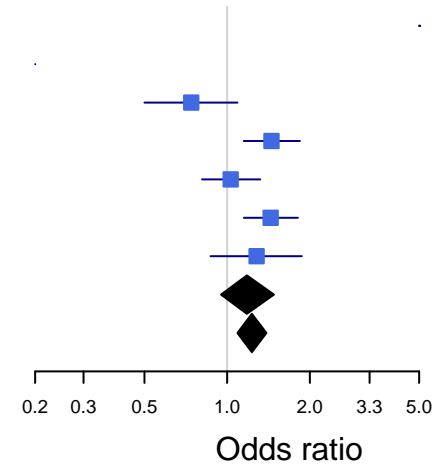

# Propensity for Valpha35

| donor                       | V35         | total TCRs   | OR          | CI               | p value      |
|-----------------------------|-------------|--------------|-------------|------------------|--------------|
| 1                           | 378         | 8250         | 0.63        | 0.41–0.97        | 0.03         |
| 2                           | 258         | 7609         | 1           | 0.74–1.37        | 1            |
| 3                           | 407         | 10674        | 1.19        | 0.96–1.46        | 0.1          |
| 4                           | 367         | 10324        | 1.6         | 1.29–1.98        | 2e-05        |
| 5                           | 181         | 11216        | 4.08        | 2.66–6.26        | 1e-10        |
| <b>random effects model</b> | <b>1591</b> | <b>48073</b> | <b>1.37</b> | <b>0.88–2.11</b> | <b>0.2</b>   |
| <b>fixed effects model</b>  | <b>1591</b> | <b>48073</b> | <b>1.34</b> | <b>1.18–1.51</b> | <b>3e-06</b> |

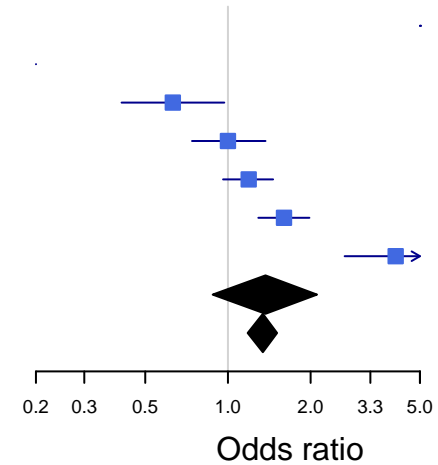

# Propensity for Valpha8.3

| donor                       | V8.3        | total TCRs   | OR          | CI               | p value      |
|-----------------------------|-------------|--------------|-------------|------------------|--------------|
| 1                           | 224         | 8250         | 1.52        | 1.02–2.26        | 0.04         |
| 2                           | 214         | 7609         | 1.14        | 0.81–1.59        | 0.5          |
| 3                           | 301         | 10674        | 1.69        | 1.32–2.16        | 3e-05        |
| 4                           | 293         | 10324        | 1.51        | 1.2–1.92         | 6e-04        |
| 5                           | 347         | 11216        | 1.78        | 1.4–2.27         | 3e-06        |
| <b>random effects model</b> | <b>1379</b> | <b>48073</b> | <b>1.55</b> | <b>1.35–1.79</b> | <b>5e-10</b> |
| <b>fixed effects model</b>  | <b>1379</b> | <b>48073</b> | <b>1.56</b> | <b>1.38–1.77</b> | <b>8e-13</b> |

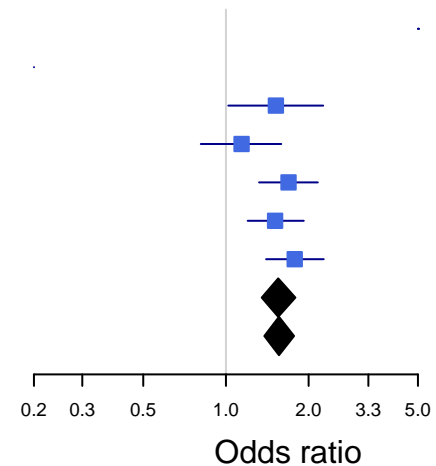

# Propensity for Valpha6

| donor                       | V6          | total TCRs   | OR          | CI               | p value      |
|-----------------------------|-------------|--------------|-------------|------------------|--------------|
| 1                           | 124         | 8250         | 1.37        | 0.8–2.34         | 0.3          |
| 2                           | 203         | 7609         | 1.47        | 1.07–2.03        | 0.02         |
| 3                           | 294         | 10674        | 2.55        | 1.95–3.34        | 1e–11        |
| 4                           | 261         | 10324        | 1.69        | 1.32–2.18        | 4e–05        |
| 5                           | 269         | 11216        | 1.74        | 1.33–2.29        | 6e–05        |
| <b>random effects model</b> | <b>1151</b> | <b>48073</b> | <b>1.78</b> | <b>1.44–2.19</b> | <b>6e–08</b> |
| <b>fixed effects model</b>  | <b>1151</b> | <b>48073</b> | <b>1.82</b> | <b>1.59–2.08</b> | <b>2e–18</b> |

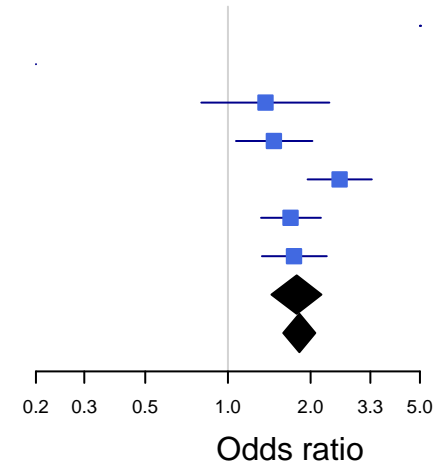



# Propensity for Valpha7

| donor                       | V7         | total TCRs   | OR          | CI               | p value      |
|-----------------------------|------------|--------------|-------------|------------------|--------------|
| 1                           | 34         | 8250         | 2.43        | 1.04–5.69        | 0.04         |
| 2                           | 39         | 7609         | 1.6         | 0.79–3.22        | 0.2          |
| 3                           | 64         | 10674        | 1.56        | 0.92–2.64        | 0.1          |
| 4                           | 89         | 10324        | 2.25        | 1.45–3.49        | 3e-04        |
| 5                           | 84         | 11216        | 3.23        | 1.81–5.78        | 8e-05        |
| <b>random effects model</b> | <b>310</b> | <b>48073</b> | <b>2.13</b> | <b>1.64–2.76</b> | <b>1e-08</b> |
| <b>fixed effects model</b>  | <b>310</b> | <b>48073</b> | <b>2.13</b> | <b>1.65–2.75</b> | <b>8e-09</b> |

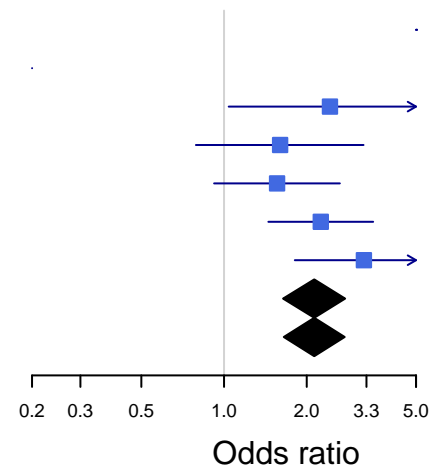

# Propensity for Valpha40

| donor                       | V40       | total TCRs   | OR          | CI               | p value      |
|-----------------------------|-----------|--------------|-------------|------------------|--------------|
| 1                           | 11        | 8250         | 0.99        | 0.12–7.89        | 1            |
| 2                           | 10        | 7609         | 0.94        | 0.19–4.63        | 0.9          |
| 3                           | 31        | 10674        | 3.88        | 1.48–10.21       | 0.006        |
| 4                           | 21        | 10324        | 1.95        | 0.8–4.8          | 0.1          |
| 5                           | 21        | 11216        | 2.06        | 0.74–5.71        | 0.2          |
| <b>random effects model</b> | <b>94</b> | <b>48073</b> | <b>2.13</b> | <b>1.28–3.54</b> | <b>0.003</b> |
| <b>fixed effects model</b>  | <b>94</b> | <b>48073</b> | <b>2.13</b> | <b>1.28–3.54</b> | <b>0.003</b> |

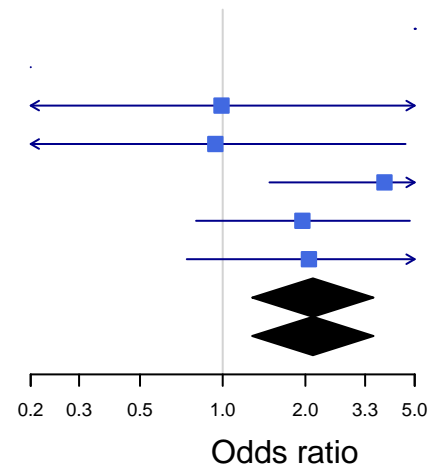

# Propensity for Valpha2

| donor                       | V2          | total TCRs   | OR          | CI               | p value           |
|-----------------------------|-------------|--------------|-------------|------------------|-------------------|
| 1                           | 651         | 8250         | 3.9         | 3.17–4.8         | 3e-38             |
| 2                           | 597         | 7609         | 1.99        | 1.64–2.41        | 2e-12             |
| 3                           | 664         | 10674        | 2.15        | 1.8–2.56         | 8e-18             |
| 4                           | 729         | 10324        | 2.58        | 2.19–3.03        | 2e-30             |
| 5                           | 915         | 11216        | 4.32        | 3.59–5.19        | 6e-55             |
| <b>random effects model</b> | <b>3556</b> | <b>48073</b> | <b>2.84</b> | <b>2.11–3.83</b> | <b>7e-12</b>      |
| <b>fixed effects model</b>  | <b>3556</b> | <b>48073</b> | <b>2.79</b> | <b>2.57–3.03</b> | <b>&lt;1e-100</b> |

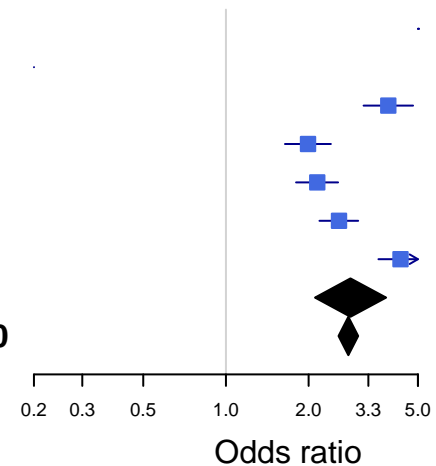

# Propensity for Valpha9.2

| donor                       | V9.2       | total TCRs   | OR          | CI               | p value      |
|-----------------------------|------------|--------------|-------------|------------------|--------------|
| 1                           | 11         | 8250         | 3.17        | 0.82–12.29       | 0.09         |
| 2                           | 34         | 7609         | 3.24        | 1.61–6.5         | 0.001        |
| 3                           | 27         | 10674        | 2.53        | 1.06–6.05        | 0.04         |
| 4                           | 42         | 10324        | 6.12        | 2.7–13.9         | 1e-05        |
| 5                           | 79         | 11216        | 1.96        | 1.17–3.28        | 0.01         |
| <b>random effects model</b> | <b>193</b> | <b>48073</b> | <b>2.95</b> | <b>1.96–4.44</b> | <b>2e-07</b> |
| <b>fixed effects model</b>  | <b>193</b> | <b>48073</b> | <b>2.81</b> | <b>2.02–3.92</b> | <b>8e-10</b> |

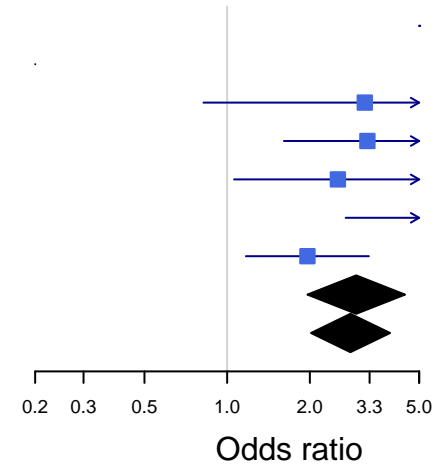

# Propensity for Valpha26.1

| donor                       | V26.1       | total TCRs   | OR          | CI               | p value           |
|-----------------------------|-------------|--------------|-------------|------------------|-------------------|
| 1                           | 787         | 8250         | 1.88        | 1.52–2.34        | 9e-09             |
| 2                           | 512         | 7609         | 2.93        | 2.43–3.55        | 2e-28             |
| 3                           | 1359        | 10674        | 4.01        | 3.47–4.62        | 7e-81             |
| 4                           | 1026        | 10324        | 4.02        | 3.47–4.66        | 4e-77             |
| 5                           | 1538        | 11216        | 4.86        | 4.17–5.66        | 2e-91             |
| <b>random effects model</b> | <b>5222</b> | <b>48073</b> | <b>3.39</b> | <b>2.56–4.5</b>  | <b>2e-17</b>      |
| <b>fixed effects model</b>  | <b>5222</b> | <b>48073</b> | <b>3.67</b> | <b>3.41–3.95</b> | <b>&lt;1e-100</b> |

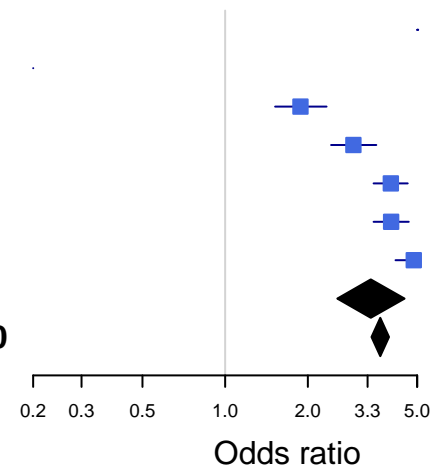

Supplement: pone.0140815.s003.pdf [file pone.0140815.s003.pdf]
